# Supplementary material for: Palladium-catalyzed synthesis of 2-amino ketones from propargylic carbonates and secondary amines
Source: Royal Society of Chemistry journal article supplement (doi:10.1039/c2ob25670c), 2012-01-01

# ELECTRONIC SUPPLEMENTARY INFORMATION

## Palladium-catalyzed synthesis of 2-amino ketones from propargylic carbonates and secondary amines

Sandro Cacchi,\* Giancarlo Fabrizi, Eleonora Filisti, Antonella Goggiamani, Antonia Iazzetti and Loredana Maurone

*Dipartimento di Chimica e Tecnologie del Farmaco  
La Sapienza, Università di Roma, P.le A. Moro 5, 00185 Rome, Italy.*

*sandro.cacchi@uniroma1.it*

### Contents:

|                                                                                                                 |    |
|-----------------------------------------------------------------------------------------------------------------|----|
| 1. General informations                                                                                         | 2  |
| 2. Typical procedures for the preparation of ethylpropargyl carbonates                                          | 2  |
| 3. Typical procedures for the preparation of 1-amino-3-arylpropan-2-ones <b>3a – 3p</b>                         | 2  |
| 4. Characterization data of 1-amino-3-arylpropan-2-ones <b>3a – 3p</b>                                          | 2  |
| 5. Typical procedures for the preparation of<br>2-oxo-1,3-diphenylpropylamino-4-carboxylates <b>7a, 7q – 7t</b> | 7  |
| 6. Characterization data of 2-oxo-1,3-diphenylpropylamino-4-carboxylates <b>7a, 7q – 7t</b>                     | 7  |
| 7. Scans of <sup>1</sup> H, <sup>13</sup> C NMR and <sup>19</sup> F spectra                                     | 10 |
| 8. Scans of <sup>1</sup> H spectra of the enamine intermediates <b>A</b> and <b>E</b>                           | 36 |

## GENERAL INFORMATIONS

**Reagents and methods:** All the starting materials, catalysts, bases, solvents and eluents are commercially available and were used as purchased, without further purification.  $^1\text{H}$  NMR (400.13 MHz),  $^{13}\text{C}$  NMR (100.6 MHz) and  $^{19}\text{F}$  spectra (376.5 MHz) were recorded with a Bruker Avance 400 spectrometer. Infrared spectra were recorded on a Jasco FT/IR-430 spectrophotometer. Melting points were determined with a Büchi B-545 apparatus and are uncorrected.

## TYPICAL PROCEDURE FOR THE PREPARATION OF ETHYL PROPARGYL CARBONATES

Ethyl propargyl carbonates were prepared via Sonogashira cross-coupling of aryl iodides with propargyl alcohols. The isolated cross-coupling products were treated with ethyl chlorocarbonate to give the propargylic esters in 70-98% overall yield.

**Typical procedure for the preparation of 3-*m*-tolylprop-2-yn-1-ol:** A flask equipped with a magnetic stirring bar was charged with  $\text{PdCl}_2(\text{PPh}_3)_2$  (0.017 mmol, 12.0 mg) and CuI (0.017 mmol, 3.2 mg) dissolved in diisopropylamine (1.8 ml) and *N,N*-dimethylformamide (0.9 ml). The resultant solution was stirred under Nitrogen at room temperature for 10 minutes before adding 3-iodotoluene (1.7 mmol, 372.8 mg) in *N*-ethyl-*N*-diisopropylamine (1.2 ml) and 2-propyn-1-ol (2.05 mmol, 115.0 mg, 119.4  $\mu\text{l}$ ). The reaction mixture was stirred for 3 hours at room temperature. After this time, the reaction mixture was diluted with  $\text{Et}_2\text{O}$  and washed with HCl 2N, with a saturated  $\text{NH}_4\text{Cl}$  solution and with brine. The organic layer was dried over  $\text{Na}_2\text{SO}_4$ , filtered and concentrated under reduced pressure. The residue was purified by flash chromatography on silica gel, eluting with a 73/27 (v/v) *n*-hexane/AcOEt mixture to obtain 211.0 mg (85% yield) of 3-*m*-tolylprop-2-yn-1-ol.

**Typical procedure for the preparation of ethyl 3-*m*-tolylprop-2-ynyl carbonate:** A flask equipped with a magnetic stirring bar was charged with 3-*m*-tolylprop-2-yn-1-ol (1.44 mmol, 210.5 mg) solved in  $\text{CH}_2\text{Cl}_2$  (3 ml) and 4-(*N,N*-dimethylamino)pyridine (2.16 mmol, 263.9 mg). The resultant solution was stirred at  $-30^\circ\text{C}$  for 10 minutes before adding ethyl chloroformate (1.73 mmol, 186.8 mg, 164.6  $\mu\text{l}$ ). The reaction mixture was stirred for 30 minutes at  $-30^\circ\text{C}$  and then for an hour at  $0^\circ\text{C}$ . After this time, the reaction mixture was diluted with  $\text{Et}_2\text{O}$  and washed with HCl 2N and with brine. The organic layer was dried over  $\text{Na}_2\text{SO}_4$ , filtered and concentrated under reduced pressure to obtain 308 mg (98% yield) of 3-*m*-tolylprop-2-ynyl carbonate.

## TYPICAL PROCEDURE FOR THE PREPARATION OF 1-AMINO-3-ARYLPROPAN-2-ONES 3a - 3p

A Carousel Tube Reaction (Radley Discovery) was charged with  $\text{Pd}_2\text{dba}_3$  (8.0 mg, 0.0087 mmol), dppf (9.7 mg, 0.0175 mmol) and anhydrous THF (1 ml). The solution was stirred under Nitrogen at room temperature for 10 minutes before adding ethyl 3-phenylprop-2-ynyl carbonate (71.4 mg, 0.350 mmol) dissolved in THF (1 ml) and morpholine (91.4 mg, 1.05 mmol, 91.5  $\mu\text{l}$ ). The reaction mixture was warmed at  $80^\circ\text{C}$  and stirred for 3 hours. After cooling, the volatile materials were evaporated at reduced pressure and the residue was purified by chromatography on neutral aluminum oxide (Brockmann 1) [*n*-hexane/EtOAc 85/15 (v/v)] to afford 58.2 mg (76% yield) of the following compound:

3a

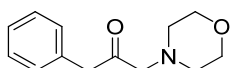

Oil; IR (neat) 3060, 3028, 2960, 2922, 2856, 1714, 1452, 1385  $\text{cm}^{-1}$ ;  $^1\text{H}$  NMR (400 MHz) ( $\text{CDCl}_3$ )  $\delta$  7.36-7.24 (m, 5 H), 3.76-3.74 (m, 6 H), 3.23 (s, 2 H), 2.47-2.46 (m, 4 H);  $^{13}\text{C}$  NMR (100.6 MHz) ( $\text{CDCl}_3$ )  $\delta$  205.8, 134.0, 129.4, 128.8, 127.1, 67.0, 66.8, 53.7, 47.8; Anal. Calcd. for  $\text{C}_{13}\text{H}_{17}\text{NO}_2$ : C, 71.21; H, 7.81; N, 6.39; Found: C, 71.13; H, 7.83; N, 6.36.

3b

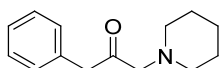

Oil; IR (Neat) 3060, 3028, 2935, 2854, 2804, 1714, 1597, 1574, 1454, 1385  $\text{cm}^{-1}$ ;  $^1\text{H}$  NMR (400 MHz) ( $\text{CDCl}_3$ )  $\delta$  7.35-7.32 (m, 2 H), 7.28-7.25 (m, 3 H), 3.78 (s, 2 H), 3.17 (s, 2 H), 2.40-2.39 (m, 4 H), 1.66-1.61 (m, 4 H), 1.46-1.45 (m, 2 H);  $^{13}\text{C}$  NMR (100.6 MHz) ( $\text{CDCl}_3$ )  $\delta$  207.0, 134.3, 129.4, 128.6, 126.9, 67.7, 54.7, 47.5, 25.8, 23.8; Anal. Calcd. for  $\text{C}_{14}\text{H}_{19}\text{NO}$ : C, 77.38; H, 8.81; N, 6.45; Found: C, 77.44; H, 8.78; N, 6.47.

3c

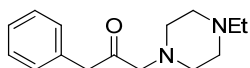

Oil; IR (Neat) 3060, 3028, 2970, 2933, 2812, 1720, 1454, 1385  $\text{cm}^{-1}$ ;  $^1\text{H}$  NMR (400 MHz) ( $\text{CDCl}_3$ )  $\delta$  7.32-7.21 (m, 5 H), 3.73 (s, 2 H), 3.20 (s, 2 H), 2.50 (m, 8 H), 2.42 (q,  $J = 7.2$  Hz, 2 H), 1.07 (t,  $J = 7.2$  Hz, 3 H);  $^{13}\text{C}$  NMR (100.6 MHz) ( $\text{CDCl}_3$ )  $\delta$  206.2, 134.1, 129.4, 128.7, 127.0, 66.8, 53.4, 52.6, 52.3, 47.7, 12.0; Anal. Calcd. for  $\text{C}_{15}\text{H}_{22}\text{N}_2\text{O}$ : C, 73.13; H, 9.00; N, 11.37; Found: C, 73.35; H, 9.02; N, 11.36.

3d

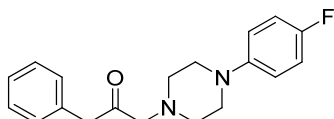

Oil; IR (Neat) 3060, 3030, 2931, 2821, 1722, 1510, 1454, 1385, 1232  $\text{cm}^{-1}$ ;  $^1\text{H}$  NMR (400 MHz) ( $\text{CDCl}_3$ )  $\delta$  7.37-7.26 (m, 5 H), 7.00-6.96 (m, 2 H), 6.90-6.87 (m, 2 H), 3.79 (s, 2 H), 3.30 (s, 2 H), 3.18-3.16 (m, 4 H), 2.65-2.63 (m, 4 H);  $^{13}\text{C}$  NMR (100.6 MHz) ( $\text{CDCl}_3$ )  $\delta$  205.9, 157.2 (d,  $J_{\text{CF}} = 237.4$  Hz), 147.9 (d,  $J_{\text{CF}} = 2.1$  Hz), 134.0, 129.4, 128.7, 127.1, 117.9 (d,  $J_{\text{CF}} = 7.6$  Hz), 115.5 (d,  $J_{\text{CF}} = 21.9$  Hz), 66.6, 53.3, 50.0, 47.8;  $^{19}\text{F}$  NMR {H} (376.5 MHz) ( $\text{CDCl}_3$ )  $\delta$  -124.3; Anal. Calcd. for  $\text{C}_{19}\text{H}_{21}\text{FN}_2\text{O}$ : C, 73.05; H, 6.78; N, 8.97; Found: C, 73.06; H, 6.77; N, 8.95.

3e

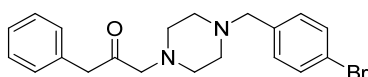

Oil; IR (Neat) 3060, 3028, 2935, 2812, 1720, 1487, 1454, 1011  $\text{cm}^{-1}$ ;  $^1\text{H}$  NMR (400 MHz) ( $\text{CDCl}_3$ )  $\delta$  7.44 (d,  $J = 8.1$  Hz, 2 H), 7.34-7.31 (m, 2 H), 7.28-7.19 (m, 5 H), 3.75 (s, 2 H), 3.46 (s, 2 H), 3.22 (s, 2 H), 2.49 (bs, 8 H);  $^{13}\text{C}$  NMR (100.6 MHz) ( $\text{CDCl}_3$ )  $\delta$  206.2, 137.3, 134.1, 131.4, 130.8, 129.5, 128.7, 127.1, 120.9, 66.8, 62.2, 53.4, 52.9, 47.7; Anal. Calcd. for  $\text{C}_{20}\text{H}_{23}\text{BrN}_2\text{O}$ : C, 62.02; H, 5.99; N, 7.23; Found: C, 62.15; H, 6.01; N, 7.25.

3f

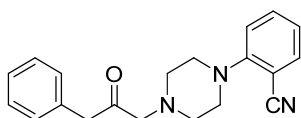

Oil; IR (Neat) 3062, 3030, 2916, 2825, 2220, 1716, 1595, 1489, 1448, 1383, 1230  $\text{cm}^{-1}$ ;  $^1\text{H}$  NMR (400 MHz) ( $\text{CDCl}_3$ )  $\delta$  7.56 (d,  $J = 7.9$  Hz, 1 H), 7.49 (t,  $J = 7.8$  Hz, 1 H), 7.36-7.25 (m, 5 H), 7.03-7.00 (m, 2 H), 3.77 (s, 2 H), 3.33 (s, 2 H), 3.28-3.26 (m, 4 H), 2.70-2.67 (m, 4 H);  $^{13}\text{C}$  NMR (100.6 MHz) ( $\text{CDCl}_3$ )  $\delta$  205.6, 155.6,

134.3, 133.9, 133.8, 129.4, 128.8, 127.1, 121.9, 118.7, 118.4, 106.1, 66.5, 53.3, 51.3, 47.8; Anal. Calcd. for  $C_{20}H_{21}N_3O$ : C, 75.21; H, 6.63; N, 13.16; Found: C, 75.26; H, 6.64; N, 13.13.

3g

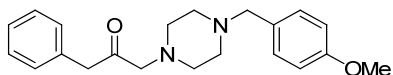

Oil; IR (Neat) 3060, 3030, 2933, 2810, 1720, 1612, 1512, 1454, 1246  $cm^{-1}$ ;  $^1H$  NMR (400 MHz) ( $CDCl_3$ )  $\delta$  7.35-7.23 (m, 7 H), 6.87 (d,  $J = 8.3$  Hz, 2 H), 3.81 (s, 3 H), 3.75 (s, 2 H), 3.47 (s, 2 H), 3.21 (s, 2 H), 2.50 (bs, 8 H);  $^{13}C$  NMR (100.6 MHz) ( $CDCl_3$ )  $\delta$  206.3, 158.8, 134.2, 130.4, 130.1, 129.5, 128.7, 127.0, 113.6, 66.8, 62.4, 55.3, 53.4, 52.8, 47.7; Anal. Calcd. for  $C_{21}H_{26}N_2O_2$ : C, 74.52; H, 7.74; N, 8.28 Found: C, 74.42; H, 7.71; N, 8.29.

3h

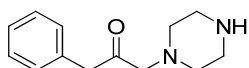

Oil; IR (Neat) 3060, 3028, 2815, 1716, 1496, 1455, 1270, 1008, 732, 701  $cm^{-1}$ ;  $^1H$  NMR (400 MHz) ( $CDCl_3$ )  $\delta$  7.33-7.22(m, 5 H), 3.75 (s, 2 H), 3.17 (s, 2 H), 2.90 (bs, 4 H), 2.41 (bs, 4 H), 2.04 (bs, 1 H);  $^{13}C$  NMR (100.6 MHz) ( $CDCl_3$ )  $\delta$  206.3, 134.1, 129.4, 128.6, 127.0, 67.3, 54.5, 47.6, 45.8; Anal. Calcd. for C, 71.53; H, 8.31; N, 12.83; Found: C, 71.43; H, 8.30; N, 12.81;

3i

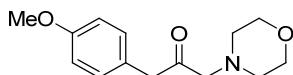

Oil; IR (Neat) 2918, 2852, 1722, 1610, 1512, 1454, 1248, 1117  $cm^{-1}$ ;  $^1H$  NMR (400 MHz) ( $CDCl_3$ )  $\delta$  7.16 (d,  $J = 8.4$  Hz, 2 H), 6.87 (d,  $J = 8.5$  Hz, 2 H), 3.80 (s, 3 H), 3.75-3.73 (m, 4 H), 3.68 (s, 2 H), 3.21 (s, 2 H), 2.47-2.45 (m, 4 H);  $^{13}C$  NMR (100.6 MHz) ( $CDCl_3$ )  $\delta$  206.1, 158.7, 130.4, 125.9, 114.2, 66.80, 66.77, 55.2, 53.6, 46.9; Anal. Calcd. for  $C_{14}H_{19}NO_3$ : C, 67.45; H, 7.68; N, 5.62; Found: C, 67.57; H, 7.70; N, 5.64.

3j

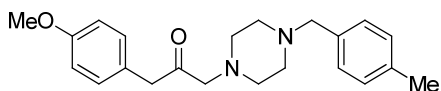

Wax; IR (KBr) 2933, 2810, 1716, 1510, 1246  $cm^{-1}$ ;  $^1H$  NMR (400 MHz) ( $CDCl_3$ )  $\delta$  7.21 (d,  $J = 7.7$  Hz, 2 H), 7.17-7.13 (m, 4 H), 6.87 (d,  $J = 8.4$  Hz, 2 H), 3.81 (s, 3 H), 3.68 (s, 2 H), 3.51 (s, 2 H), 3.20 (s, 2 H), 2.52-2.50 (m, 8 H), 2.35 (s, 3 H);  $^{13}C$  NMR (100.6 MHz) ( $CDCl_3$ )  $\delta$  206.6, 158.7, 136.7, 134.7, 130.4, 129.3, 128.9, 126.2, 114.2, 66.6, 62.7, 55.3, 53.3, 52.8, 46.8, 21.1; Anal. Calcd. for  $C_{22}H_{28}N_2O_2$ : C, 74.97; H, 8.01; N, 7.95; Found: C, 74.81; H, 7.99; N, 7.93.

3k

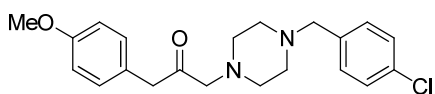

Oil; IR (Neat) 2935, 2812, 1720, 1610, 1512, 1456, 1248  $cm^{-1}$ ;  $^1H$  NMR (400 MHz) ( $CDCl_3$ )  $\delta$  7.30-7.25 (m, 4 H), 7.15 (d,  $J = 8.3$  Hz, 2 H), 6.86 (d,  $J = 8.4$  Hz, 2 H), 3.80 (s, 3 H), 3.68 (s, 2 H), 3.49 (s, 2 H), 3.21 (s, 2 H), 2.50 (bs, 8 H);  $^{13}C$  NMR (100.6 MHz) ( $CDCl_3$ )  $\delta$  206.5, 158.7, 136.7, 132.8, 130.4, 128.4, 126.1, 114.2,

66.6, 62.2, 55.3, 53.3, 52.9, 46.8; Anal. Calcd. for  $C_{21}H_{25}ClN_2O_2$ : C, 67.64; H, 6.76; N, 7.51; Found: C, 67.73; H, 6.77; N, 7.53;

3l

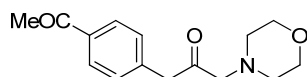

Oil; IR (Neat) 2922, 2856, 1724, 1680, 1606, 1452, 1385, 1269, 1115  $cm^{-1}$ ;  $^1H$  NMR (400 MHz) ( $CDCl_3$ )  $\delta$  7.91 (d,  $J = 8.0$  Hz, 2 H), 7.32 (d,  $J = 8.0$  Hz, 2 H), 3.83 (s, 2 H), 3.73-3.71 (m, 4 H), 3.21 (s, 2 H), 2.58 (s, 3 H), 2.47-2.44 (m, 4 H);  $^{13}C$  NMR (100.6 MHz) ( $CDCl_3$ )  $\delta$  204.9, 197.5, 139.3, 136.0, 129.7, 128.7, 67.4, 66.7, 53.7, 47.3, 26.5; Anal. Calcd. for  $C_{15}H_{19}NO_3$ : C, 68.94; H, 7.33; N, 5.36; Found: C, 68.85; H, 7.33; N, 5.34;

3m

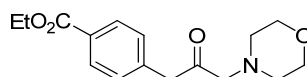

Oil; IR (Neat) 2978, 2925, 2856, 1712, 1610, 1448, 1385, 1275  $cm^{-1}$ ;  $^1H$  NMR (400 MHz) ( $CDCl_3$ )  $\delta$  7.99 (d,  $J = 8.1$  Hz, 2 H), 7.29 (d,  $J = 8.0$  Hz, 2 H), 4.35 (q,  $J = 7.1$  Hz, 2 H), 3.80 (s, 2 H), 3.72-3.70 (m, 4 H), 3.19 (s, 2 H), 2.45-2.42 (m, 4 H), 1.37 (t,  $J = 7.1$  Hz, 3 H);  $^{13}C$  NMR (100.6 MHz) ( $CDCl_3$ )  $\delta$  205.0, 166.3, 139.0, 129.9, 129.5, 129.4, 67.3, 66.8, 61.0, 53.7, 47.5, 14.3; Anal. Calcd. for  $C_{16}H_{21}NO_4$ : C, 65.96; H, 7.27; N, 4.81; Found: C, 65.59; H, 7.30; N, 4.83.

3n

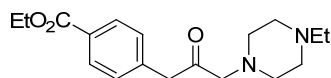

Oil; IR (Neat) 2974, 2931, 2816, 1716, 1452, 1385, 1277, 1105  $cm^{-1}$ ;  $^1H$  NMR (400 MHz) ( $CDCl_3$ )  $\delta$  7.96 (d,  $J = 8.1$  Hz, 2 H), 7.27 (d,  $J = 8.1$  Hz, 2 H), 4.33 (q,  $J = 7.1$  Hz, 2 H), 3.83 (s, 2 H), 3.22 (s, 2 H), 2.54 (bs, 8 H), 2.46 (q,  $J = 7.2$  Hz, 2 H), 1.40 (t,  $J = 7.1$  Hz, 3 H), 1.11 (t,  $J = 7.1$  Hz, 3 H);  $^{13}C$  NMR (100.6 MHz) ( $CDCl_3$ )  $\delta$  205.5, 166.3, 139.2, 129.8, 129.5, 129.3, 67.1, 60.9, 53.4, 52.5, 52.2, 47.3, 14.3, 11.9; Anal. Calcd. for  $C_{18}H_{26}N_2O_3$ : C, 67.90; H, 8.23; N, 8.80; Found: C, 67.81; H, 8.21; N, 8.78;

3o

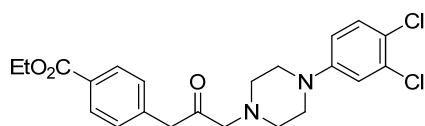

Oil; IR (Neat) 2979, 2933, 2827, 1714, 1593, 1483, 1452, 1385, 1277  $cm^{-1}$ ;  $^1H$  NMR (400 MHz) ( $CDCl_3$ )  $\delta$  8.01 (d,  $J = 8.2$  Hz, 2 H), 7.31 (d,  $J = 8.1$  Hz, 2 H), 7.25 (d,  $J = 8.9$  Hz, 1 H), 6.93 (d,  $J = 2.7$  Hz, 1 H), 6.71 (dd,  $J^1 = 8.9$  Hz,  $J^2 = 2.7$  Hz, 1 H), 4.37 (q,  $J = 7.1$  Hz, 2 H), 3.84 (s, 2 H), 3.28 (s, 2 H), 3.21-3.19 (m, 4 H), 2.62-2.59 (m, 4 H), 1.40 (t,  $J = 7.1$  Hz, 3 H);  $^{13}C$  NMR (100.6 MHz) ( $CDCl_3$ )  $\delta$  205.0, 166.3, 150.5, 139.0, 132.8, 130.5, 129.9, 129.5, 122.3, 117.3, 115.4, 66.8, 61.0, 53.0, 48.5, 47.5, 14.4; Anal. Calcd. for  $C_{22}H_{24}Cl_2N_2O_3$ : C, 60.70; H, 5.56; N, 6.43; Found: C, 60.81; H, 5.57; N, 6.45.

3p

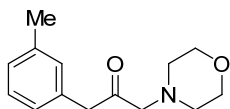

Oil; IR (Neat) 2958, 2920, 2854, 2812, 1720, 1606, 1452, 1385, 1117  $\text{cm}^{-1}$ ;  $^1\text{H}$  NMR (400 MHz) ( $\text{CDCl}_3$ )  $\delta$  7.22 (t,  $J = 7.5$  Hz, 1 H), 7.10-7.03 (m, 3 H), 3.75-3.73 (m, 4 H), 3.71 (s, 2 H), 3.22 (s, 2 H), 2.47-2.45 (m, 4 H), 2.35 (s, 3 H);  $^{13}\text{C}$  NMR (100.6 MHz) ( $\text{CDCl}_3$ )  $\delta$  205.9, 138.4, 133.9, 130.2, 128.7, 127.9, 126.4, 66.9, 66.8, 53.7, 47.8, 21.4; Anal. Calcd. for  $\text{C}_{14}\text{H}_{19}\text{NO}_2$ : C, 72.07; H, 8.21; N, 6.00; Found: C, 72.19; H, 8.24; N, 5.98.

## TYPICAL PROCEDURE FOR THE PREPARATION OF 2-OXO-1,3-DIPHENYLPROPYLAMINO-4-CARBOXYLATES 7a, 7q – 7t

A Carousel Tube Reaction (Radley Discovery) was charged with Pd<sub>2</sub>dba<sub>3</sub> (7.8 mg, 0.0085 mmol), dppf (9.4 mg, 0.0170 mmol) and anhydrous THF (1 ml). The resultant solution was stirred under Nitrogen at room temperature for 10 minutes before adding 1,3-diphenylprop-2-ynyl ethyl carbonate (95.0 mg, 0.34 mmol) dissolved in THF (1 ml) and morpholine (88.7 mg, 1.02 mmol, 88.8 μl). The reaction mixture was warmed at 80°C and stirred for 1 hours. After cooling, the volatile materials were evaporated at reduced pressure and the residue was purified by chromatography on silica gel eluting with a 70/30 (v/v) n-hexane/AcOEt mixture to afford 76.7 mg (77% yield) of the following compound:

7a

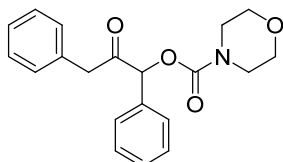

Mp: 132-134 °C; IR (KBr) 3066, 2974, 2904, 2860, 1732, 1714, 1431, 1234, 1117 cm<sup>-1</sup>; <sup>1</sup>H NMR (400 MHz) (CDCl<sub>3</sub>) δ 7.41-7.23 (m, 8 H) 7.05-7.03 (m, 2 H), 6.09 (s, 1 H), 3.75-3.53 (m, 10 H); <sup>13</sup>C NMR (100.6 MHz) (CDCl<sub>3</sub>) δ 202.2, 154.3, 133.3, 133.0, 129.7, 129.4, 129.1, 128.5, 128.4, 127.1, 81.0, 66.5, 45.7, 44.6, 44.1; Anal. Calcd. for C<sub>20</sub>H<sub>21</sub>NO<sub>4</sub>: C, 70.78; H, 6.24; N, 4.13; Found: C, 70.89; H, 6.26; N, 4.11.

7q + 7q'

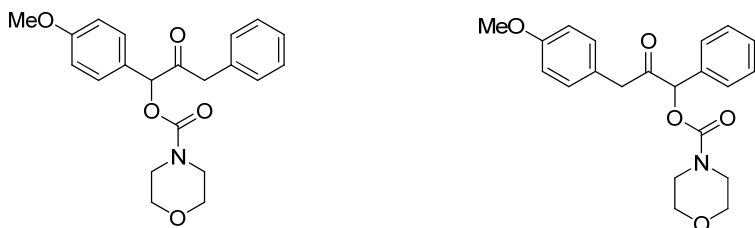

Mixture; <sup>1</sup>H NMR (400 MHz) (CDCl<sub>3</sub>) δ 7.41-7.39 (m, 2 H), 7.30-7.21 (m, 3 H), 7.06-7.04 (m, 1 H), 6.96-6.92 (m, 2 H), 6.81 (m, 1 H), 6.08 (s, 0.25 H, PhCH<sub>2</sub>CO, 7q'), 6.04 (s, 0.75 H, *p*-CH<sub>3</sub>OPhCH<sub>2</sub>CO, 7q), 3.83 (s, 2.25 H, *p*-CH<sub>3</sub>OPhCH<sub>2</sub>CO, 7q), 3.77 (s, 0.75 H, *p*-CH<sub>3</sub>OPhCH<sub>2</sub>, 7q'), 3.73-3.43 (m, 10 H); <sup>13</sup>C NMR (100.6 MHz) (CDCl<sub>3</sub>) δ (some chemical shifts are isochronous) 202.6 (*p*-MeOPhCH<sub>2</sub>CO, 7q'), 202.4 (PhCH<sub>2</sub>CO, 7q), 160.4, 158.7, 154.5, 154.4, 133.3, 133.1, 130.7, 129.9, 129.7, 129.4, 129.0, 128.5, 128.4, 127.0, 125.1, 125.0, 114.5, 114.0, 80.9 (PhCH<sub>2</sub>CO, 7q'), 80.5 (*p*-MeOPhCH<sub>2</sub>CO, 7q), 66.5, 55.4, 55.2, 45.7, 44.8, 44.6, 44.0;

7r

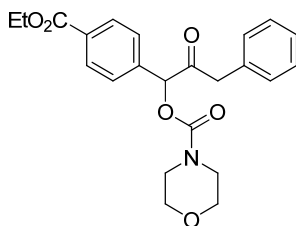

Oil; IR (Neat) 2924, 2858, 1712, 1612, 1456, 1433, 1277, 1238, 1111 cm<sup>-1</sup>; <sup>1</sup>H NMR (400 MHz) (CDCl<sub>3</sub>) δ 8.07 (d, *J* = 8.1 Hz, 2 H), 7.43 (d, *J* = 8.0 Hz, 2 H), 7.28-7.26 (m, 3 H), 7.05-7.03 (m, 2 H), 6.12 (s, 1 H), 4.42 (q, *J* = 7.0 Hz, 2 H), 3.76 (s, 2 H), 3.71-3.47 (m, 8 H), 1.43 (t, *J* = 7.0 Hz, 3 H); <sup>13</sup>C NMR (100.6 MHz) (CDCl<sub>3</sub>) δ 201.8, 166.0, 154.1, 138.0, 132.6, 131.4, 130.2, 129.6, 128.6, 128.1, 127.2, 80.4, 66.4 (bs), 61.3,

45.9, 44.6, 44.1, 14.3; Anal. Calcd. for C<sub>23</sub>H<sub>25</sub>NO<sub>6</sub>: C, 67.14; H, 6.12; N, 3.40; Found: C, 67.20; H, 6.14; N, 3.42.

7r'

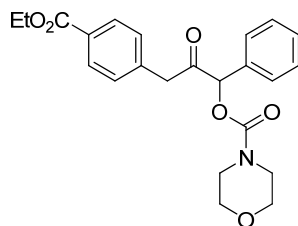

Oil; IR (Neat) 2978, 2925, 2858, 1712, 1612, 1429, 1277, 1238, 1107 cm<sup>-1</sup>; <sup>1</sup>H NMR (400 MHz) (DMSO-d<sub>6</sub>) (350 K) δ 7.84 (d, *J* = 7.6 Hz, 2 H), 7.47-7.42 (m, 5 H), 7.18 (d, *J* = 7.6 Hz, 2 H), 6.14 (s, 1 H), 4.33 (q, *J* = 6.8 Hz, 2 H), 4.00 (d, *J* = 16.4 Hz, 1 H), 3.88 (d, *J* = 16.4 Hz, 1 H), 3.63-3.61 (m, 4 H), 3.48-3.47 (m, 4 H), 1.34 (t, *J* = 6.8 Hz, 3 H); <sup>13</sup>C NMR (100.6 MHz) (DMSO-d<sub>6</sub>) (350 K) δ 202.4, 166.1, 154.2, 139.7, 134.3, 130.3, 129.4, 129.35, 129.28, 129.1, 128.2, 81.2, 66.3, 61.0, 44.8, 44.6, 14.5; Anal. Calcd. for C<sub>23</sub>H<sub>25</sub>NO<sub>6</sub>: C, 67.14; H, 6.12; N, 3.40; Found: C, 67.20; H, 6.16; N, 3.39.

7s

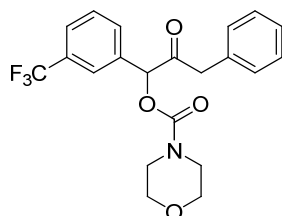

Oil; IR (Neat) 2924, 2858, 1712, 1433, 1331, 1238, 1124 cm<sup>-1</sup>; <sup>1</sup>H NMR (400 MHz) (CDCl<sub>3</sub>) δ 7.66-7.64 (m, 1 H), 7.54-7.49 (m, 3 H), 7.28-7.23 (m, 3H), 7.05-7.04 (m, 2 H), 6.12 (s, 1 H), 3.78 (s, 2 H), 3.72-3.53 (m, 8 H); <sup>13</sup>C NMR (100.6 MHz) (CDCl<sub>3</sub>) δ (323 K) δ 201.9, 154.0, 134.6, 132.5, 131.5, 131.4 (q, *J*<sub>CF</sub> = 32.6 Hz), 129.6, 129.5, 128.6, 127.3, 126.1 (q, *J*<sub>CF</sub> = 3.6 Hz), 125.0 (q, *J*<sub>CF</sub> = 3.8 Hz), 123.7 (q, *J*<sub>CF</sub> = 271.5 Hz), 80.0, 66.5, 46.3, 44.6, 44.1; <sup>19</sup>F NMR {H} (376.5 MHz) (CDCl<sub>3</sub>) δ -62.7; Anal. Calcd. for C<sub>21</sub>H<sub>20</sub>F<sub>3</sub>NO<sub>4</sub>: C, 61.91; H, 4.95; N, 3.44; Found: C, 61.82; H, 4.93; N, 3.47.

7s'

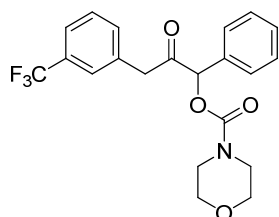

Mp: 97-99 °C; IR (KBr) 2862, 1728, 1705, 1433, 1336, 1117 cm<sup>-1</sup>; <sup>1</sup>H NMR (400 MHz) (CDCl<sub>3</sub>) δ 7.49 (d, *J* = 7.6 Hz, 1 H), 7.44-7.37 (m, 6 H), 7.24 (d, *J* = 7.9 Hz, 1 H), 7.21 (s, 1 H), 6.07 (s, 1 H), 3.81-3.48 (m, 10 H); <sup>13</sup>C NMR (100.6 MHz) (DMSO-d<sub>6</sub>) (350 K) δ 202.6, 154.2, 135.8, 134.2, 134.1, 129.7, 129.5, 129.4, 129.3, 128.3, 126.5 (q, *J*<sub>CF</sub> = 4.0 Hz), 124.7 (q, *J*<sub>CF</sub> = 271.4 Hz), 123.7 (q, *J*<sub>CF</sub> = 3.8 Hz), 81.3, 66.3, 44.6, 44.4; <sup>19</sup>F NMR {H} (376.5 MHz) (CDCl<sub>3</sub>) δ -62.6; Anal. Calcd. for C<sub>21</sub>H<sub>20</sub>F<sub>3</sub>NO<sub>4</sub>: C, 61.91; H, 4.95; N, 3.44; Found: C, 61.82; H, 4.93; N, 3.42.



7t + 7t'

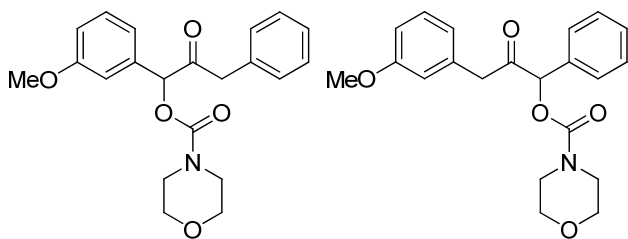

Mixture;  $^1\text{H}$  NMR (400 MHz) ( $\text{CDCl}_3$ )  $\delta$  7.40-7.16 (m, 5 H), 7.06-7.05 (m, 1 H), 6.99-6.97 (m, 1 H), 6.88 (s, 0.43 H), 6.79-6.77 (m, 0.56 H), 6.64-6.62 (m, 0.56 H), 6.56 (s, 0.57 H), 6.08 (s, 0.57 H,  $\text{PhCHOCO}$ , 7t'), 6.06 (s, 0.43 H, *m*- $\text{MeOPhCHOCO}$ , 7t), 3.80 (s, 1.3 H, *m*- $\text{CH}_3\text{OPhCHOCO}$ , 7t), 3.74-3.51 (m, 11.7 H);  $^{13}\text{C}$  NMR (100.6 MHz) ( $\text{CDCl}_3$ ) (some chemical shifts are isochronous)  $\delta$  202.13 (*m*- $\text{MeOPhCH}_2\text{CO}$ , 7t'), 202.11 ( $\text{PhCH}_2\text{CO}$ , 7t), 160.01, 159.64, 154.33, 154.30, 134.7, 134.4, 133.3, 133.1, 130.1, 129.7, 129.5, 129.4, 129.1, 128.5, 128.4, 127.1, 122.0, 120.7, 115.09, 114.95, 113.8, 112.8, 81.0 ( $\text{PhCHOCO}$ , 7t'), 80.9 (*m*- $\text{MeOPhCHOCO}$ , 7t), 66.5, 55.3, 55.1, 45.7, 45.6, 44.6, 44.1.

**3a**

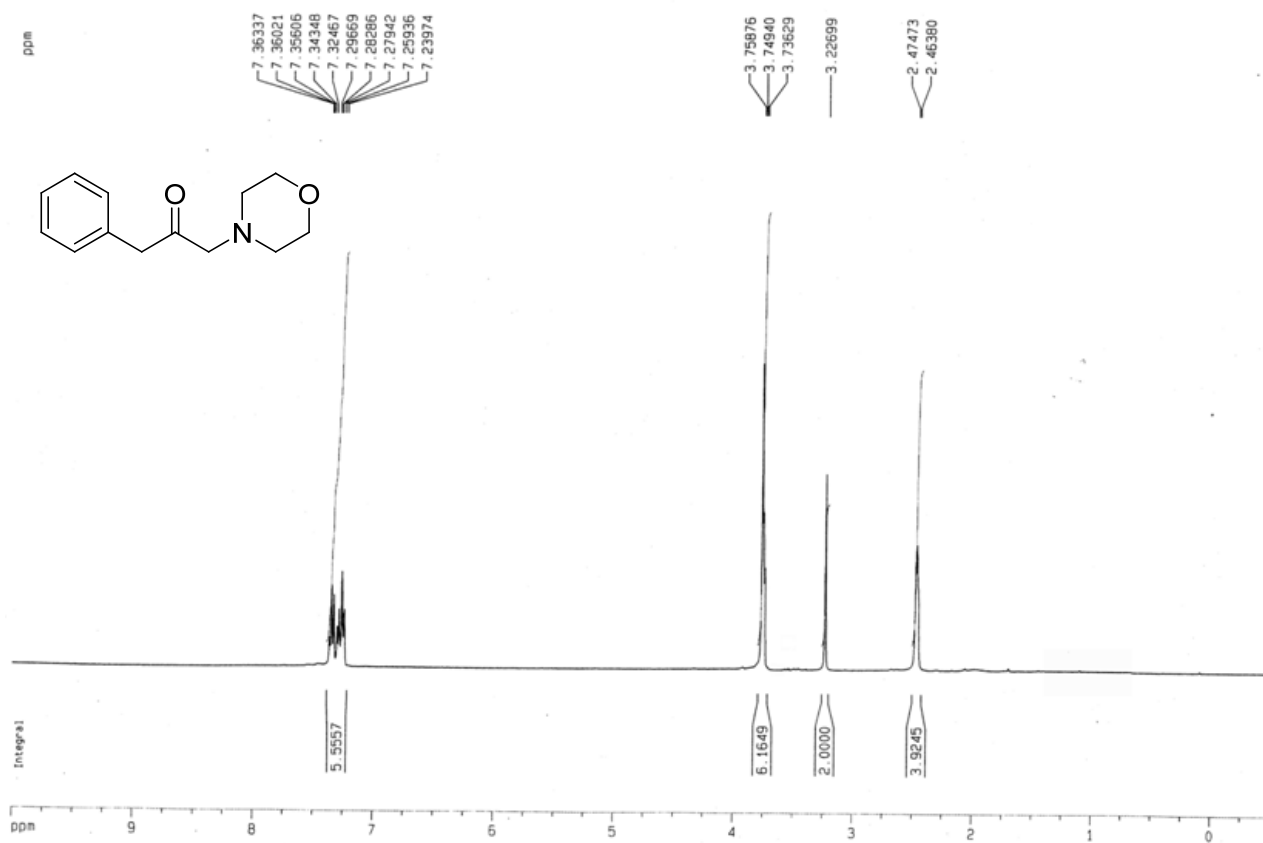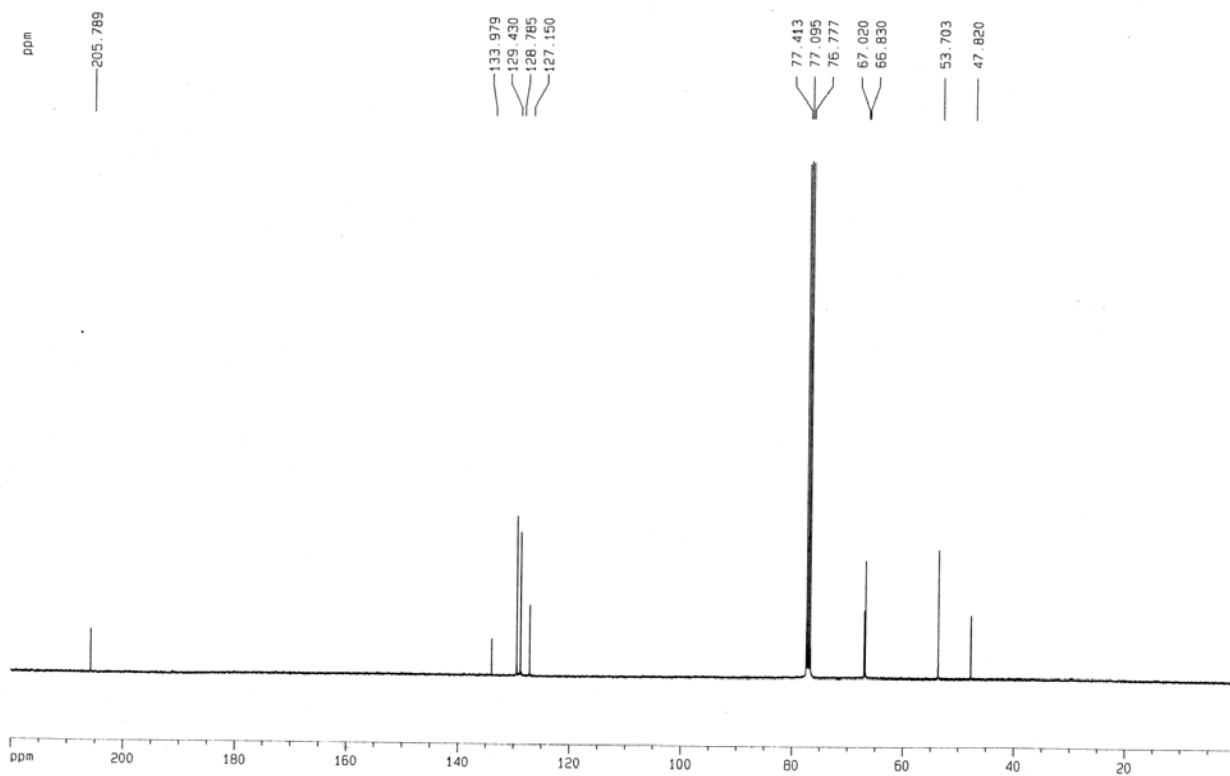

3b

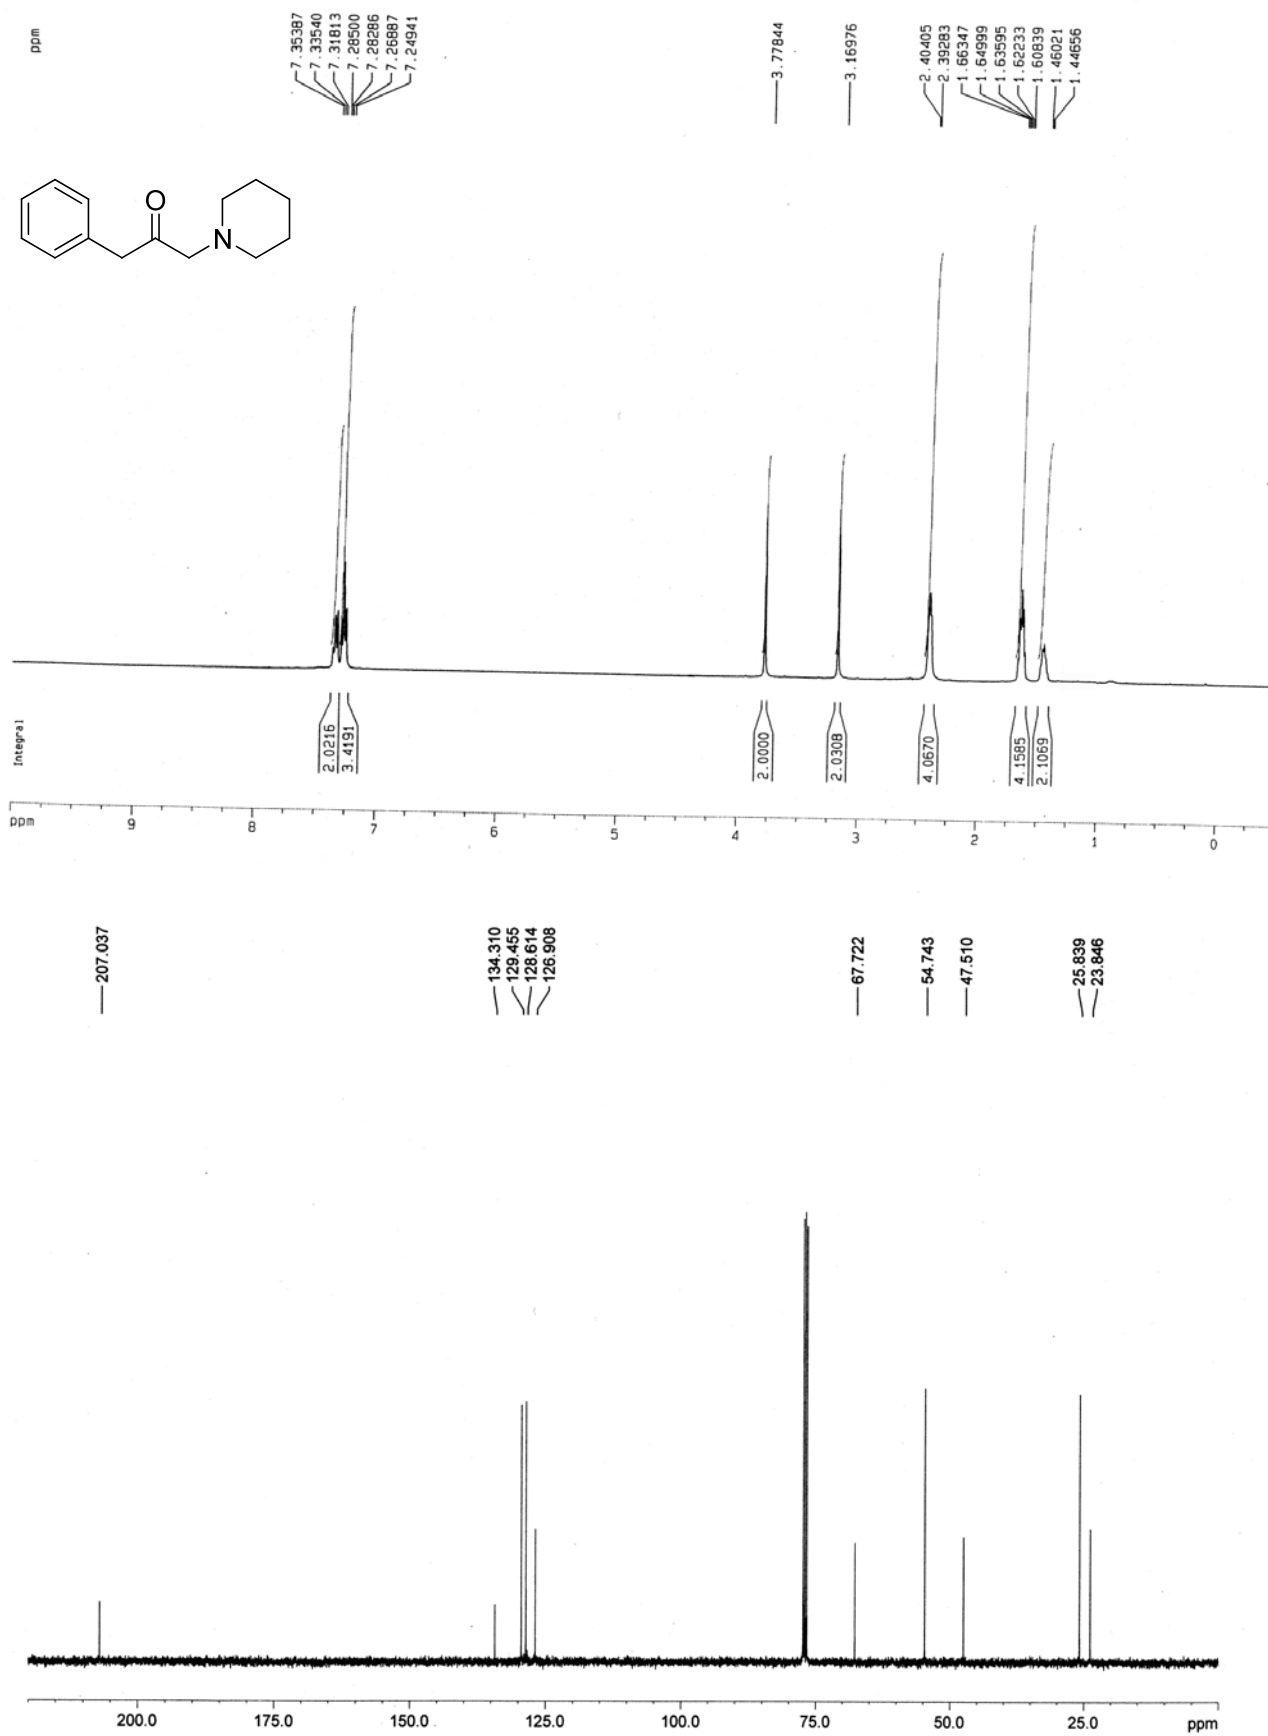

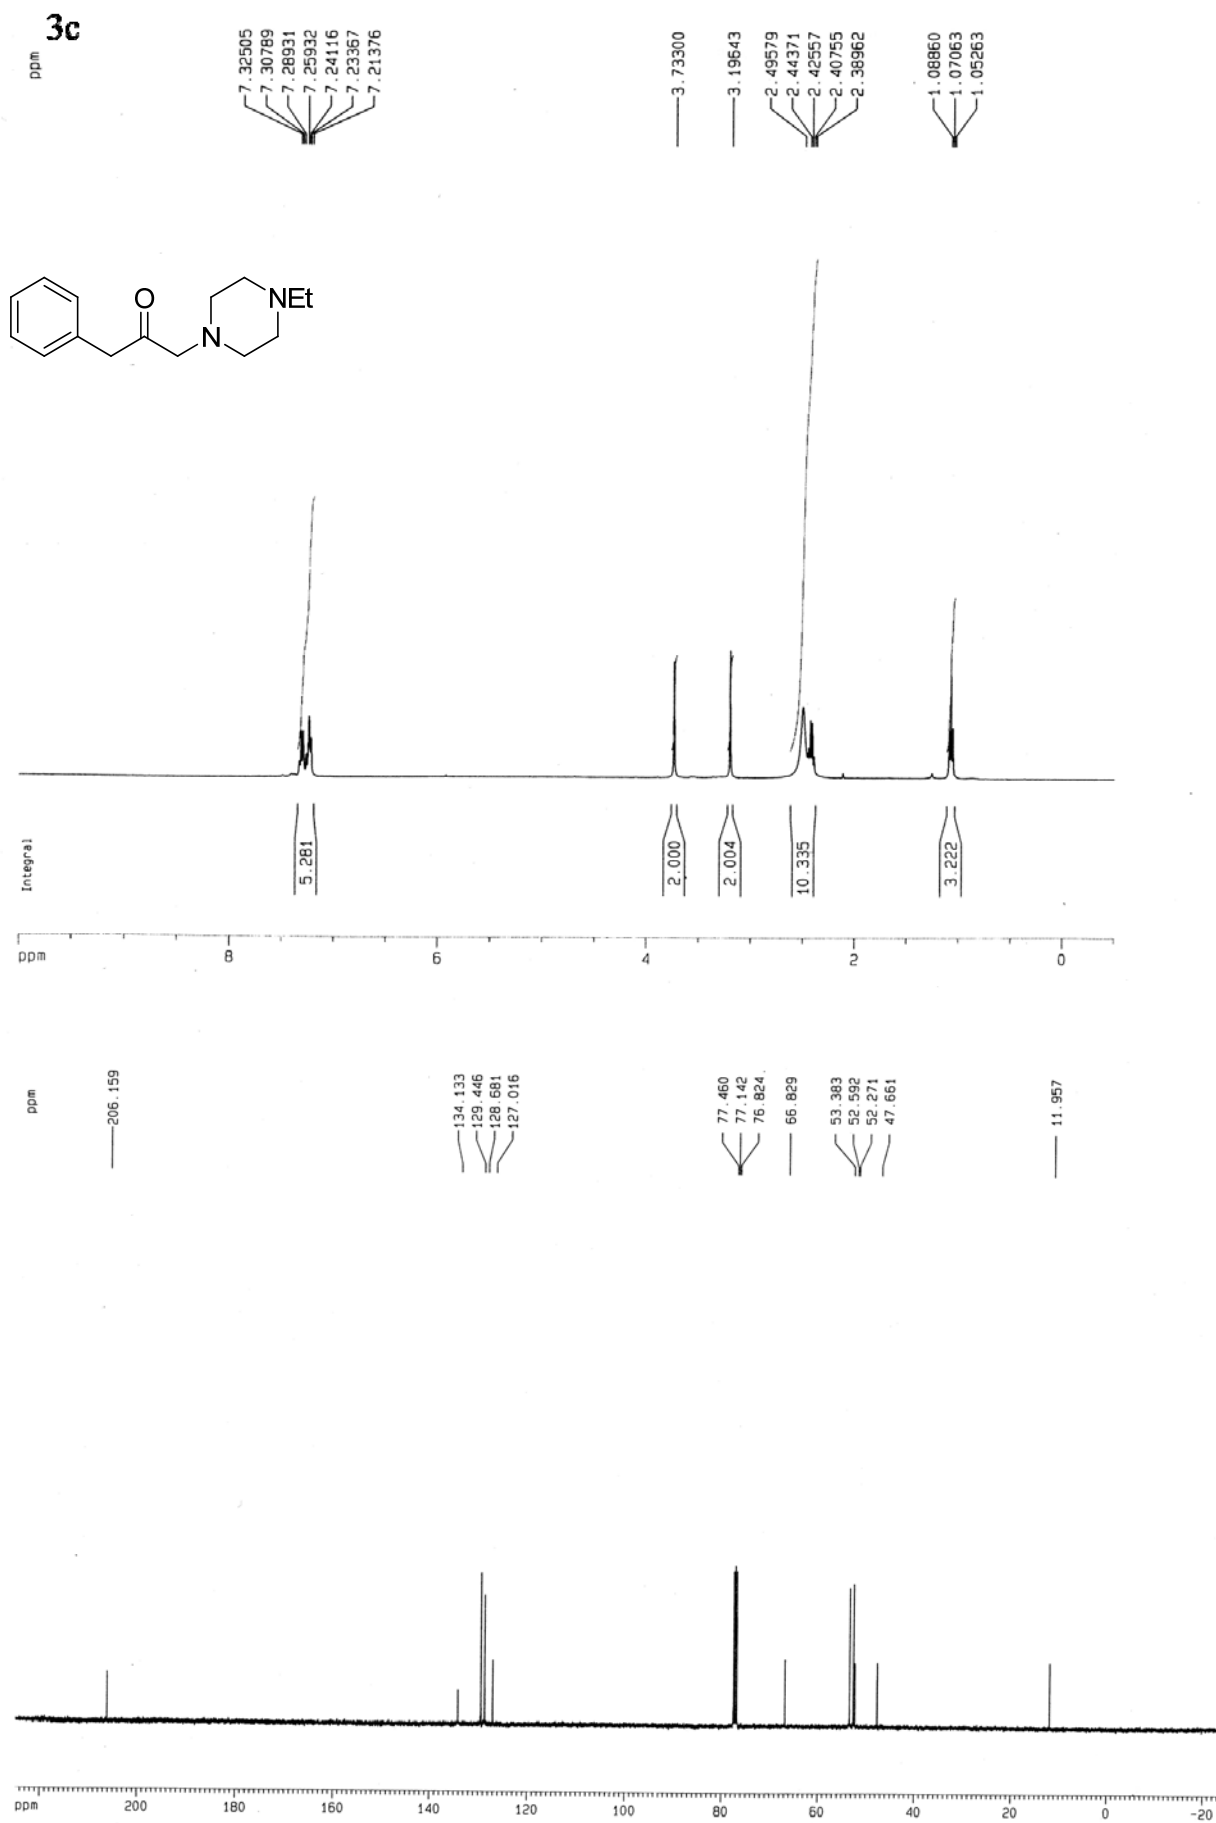

3d

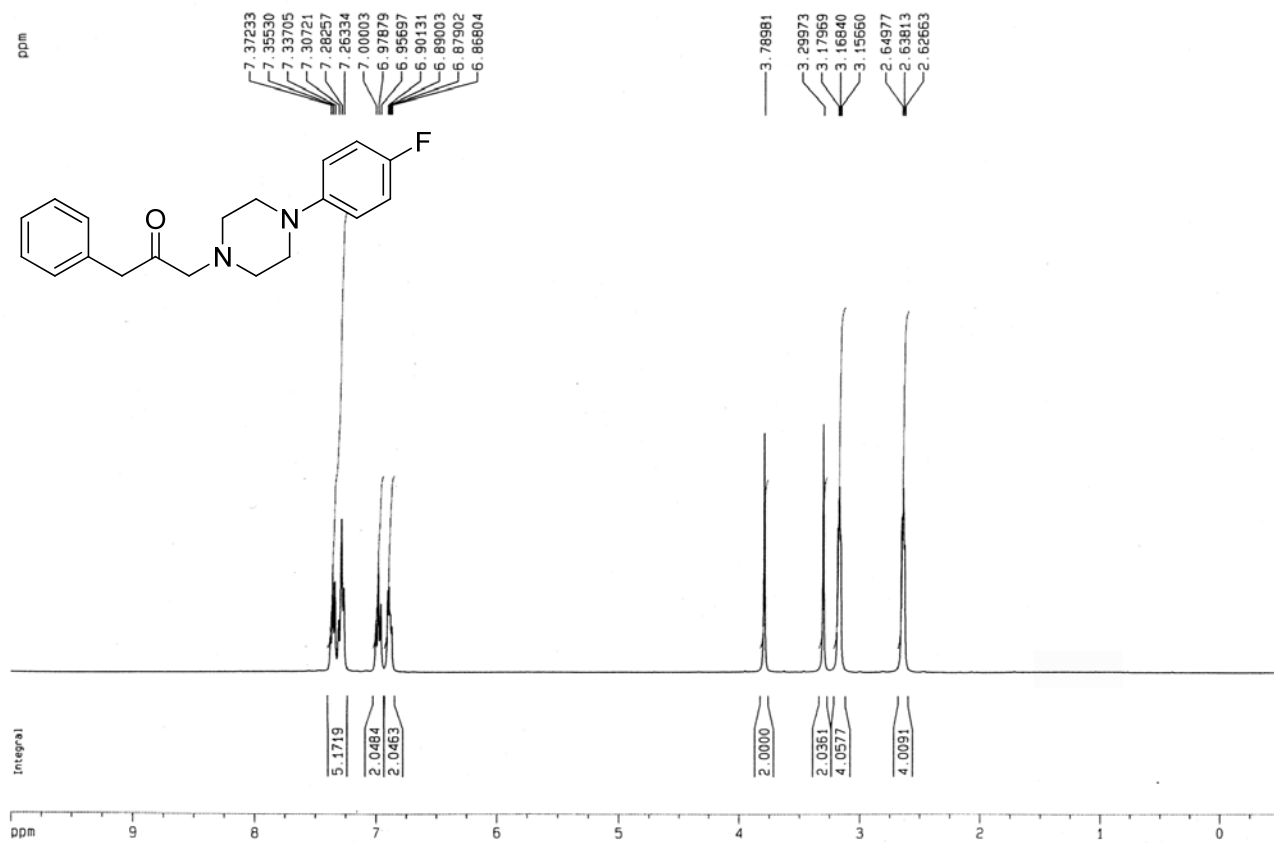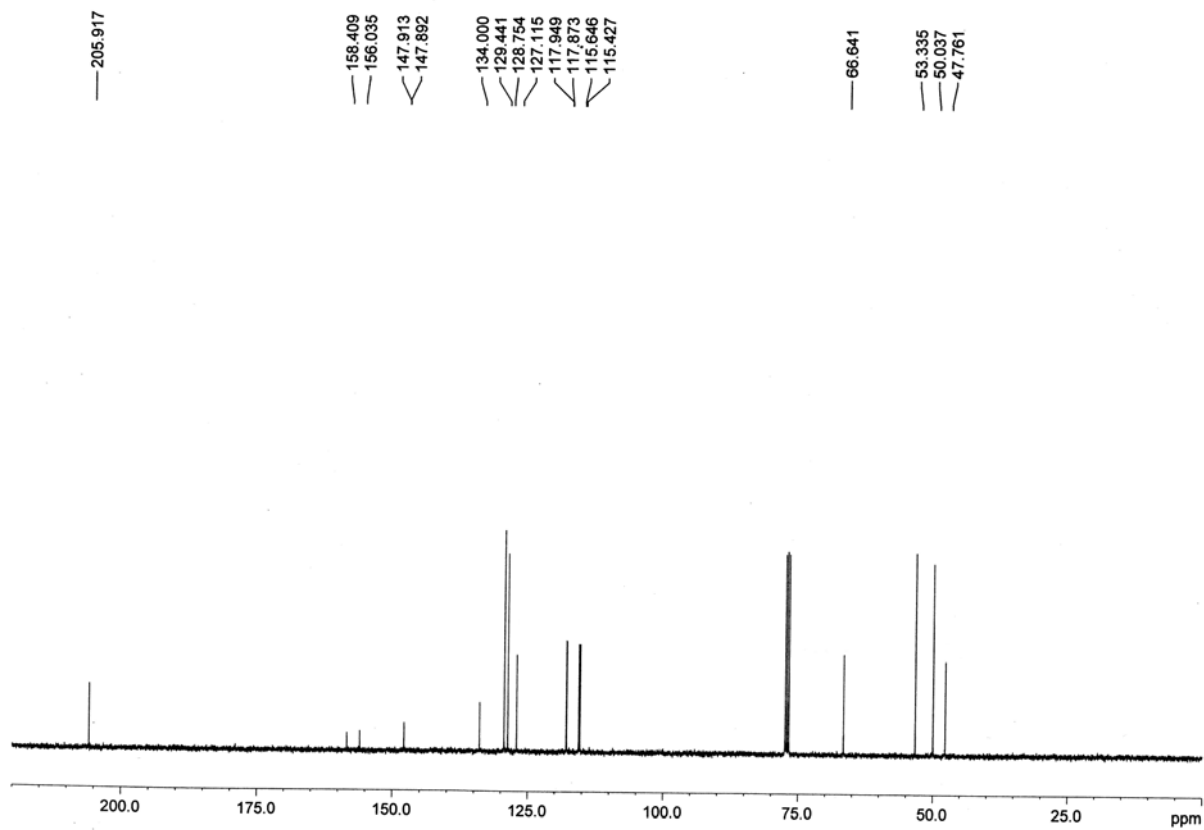

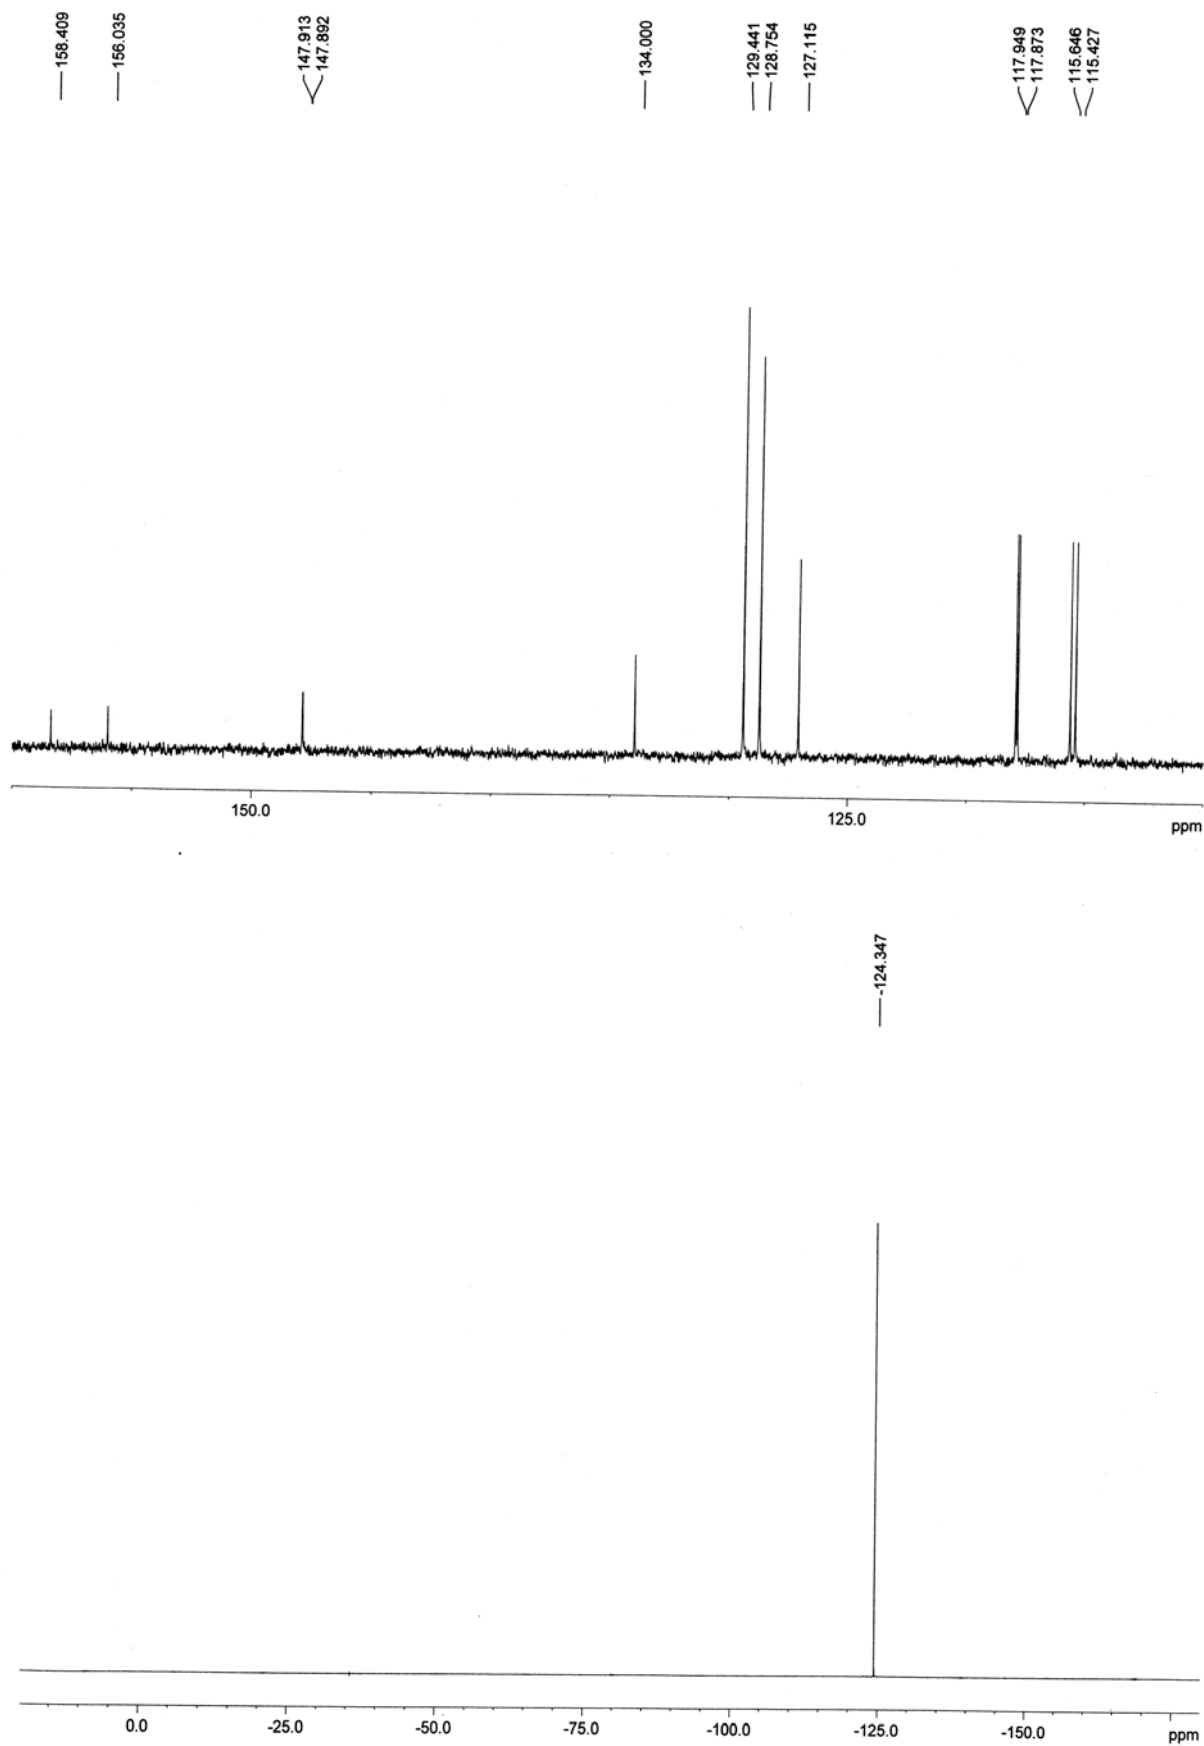

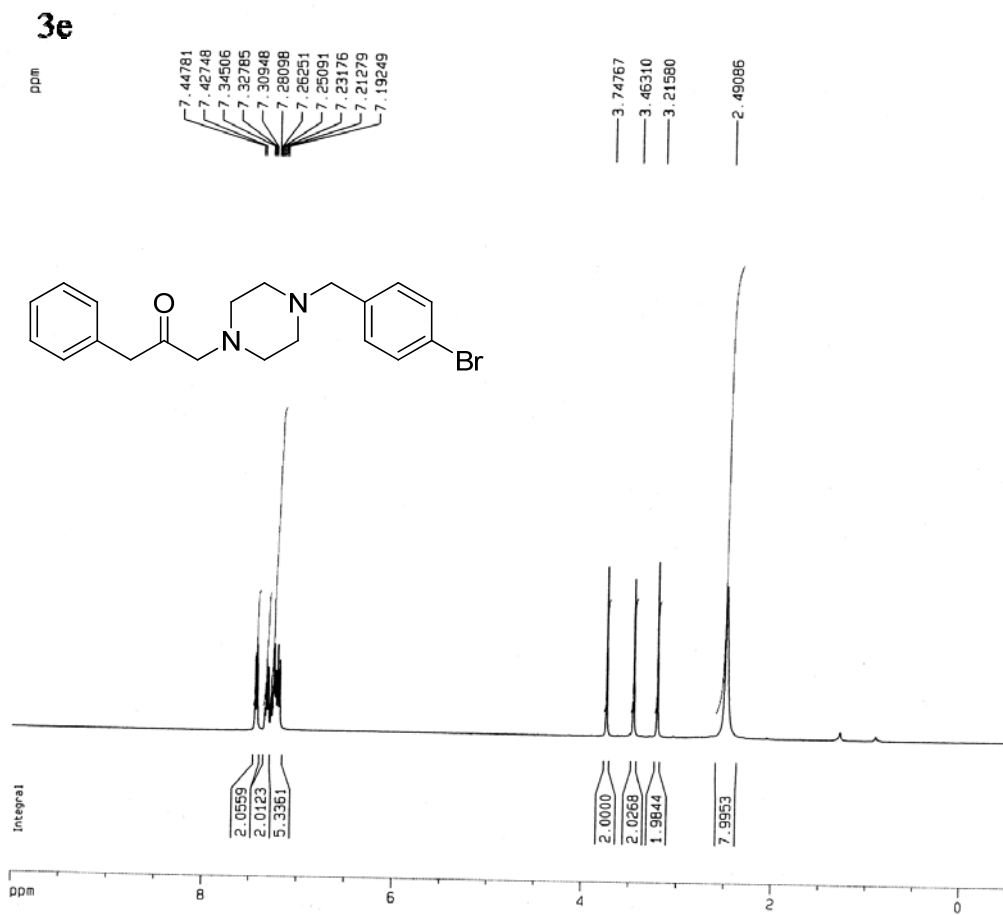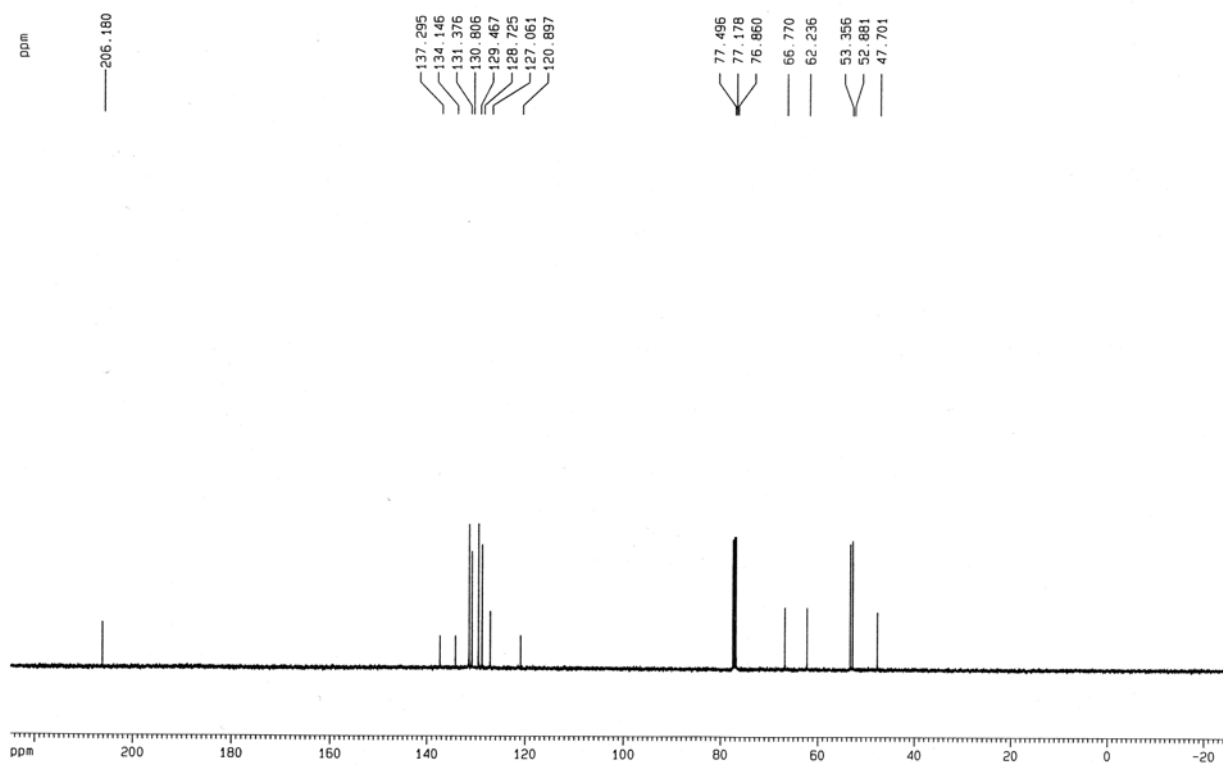

3f

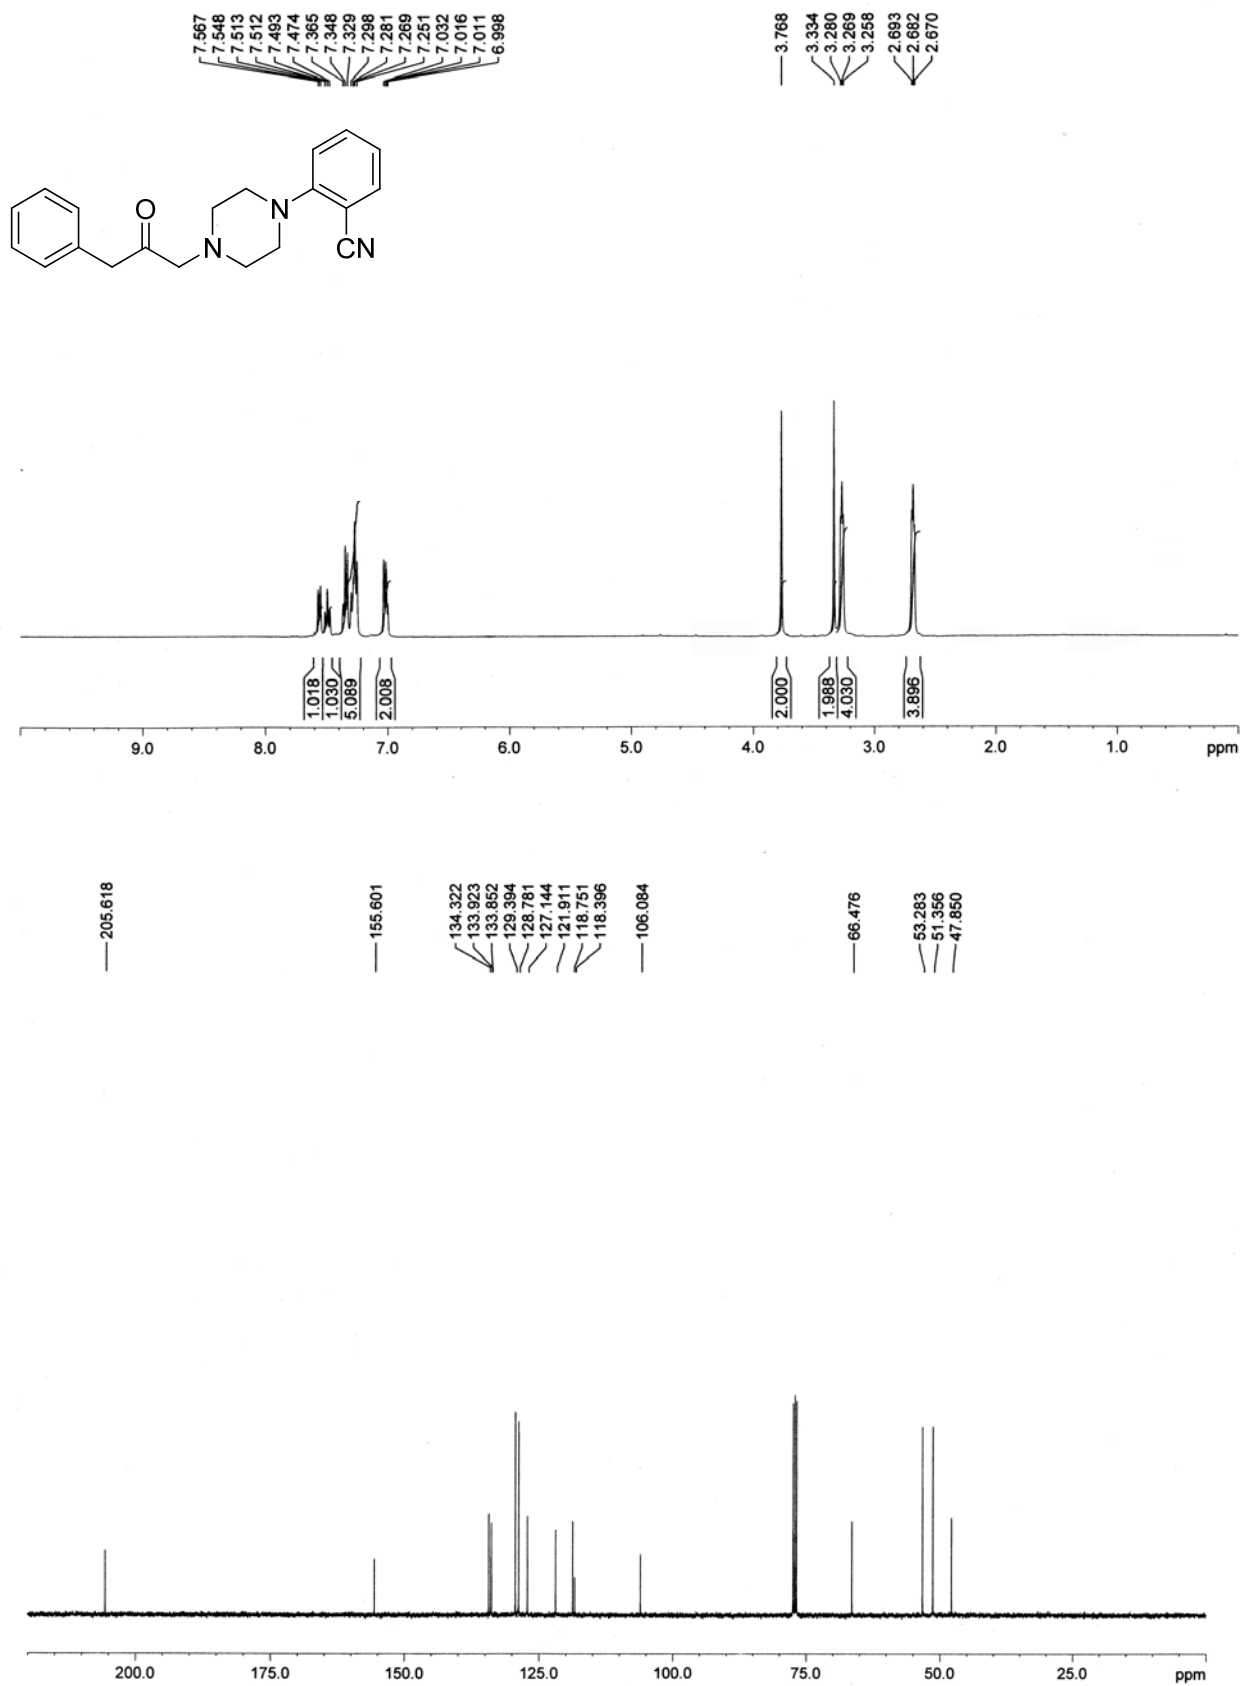



3g

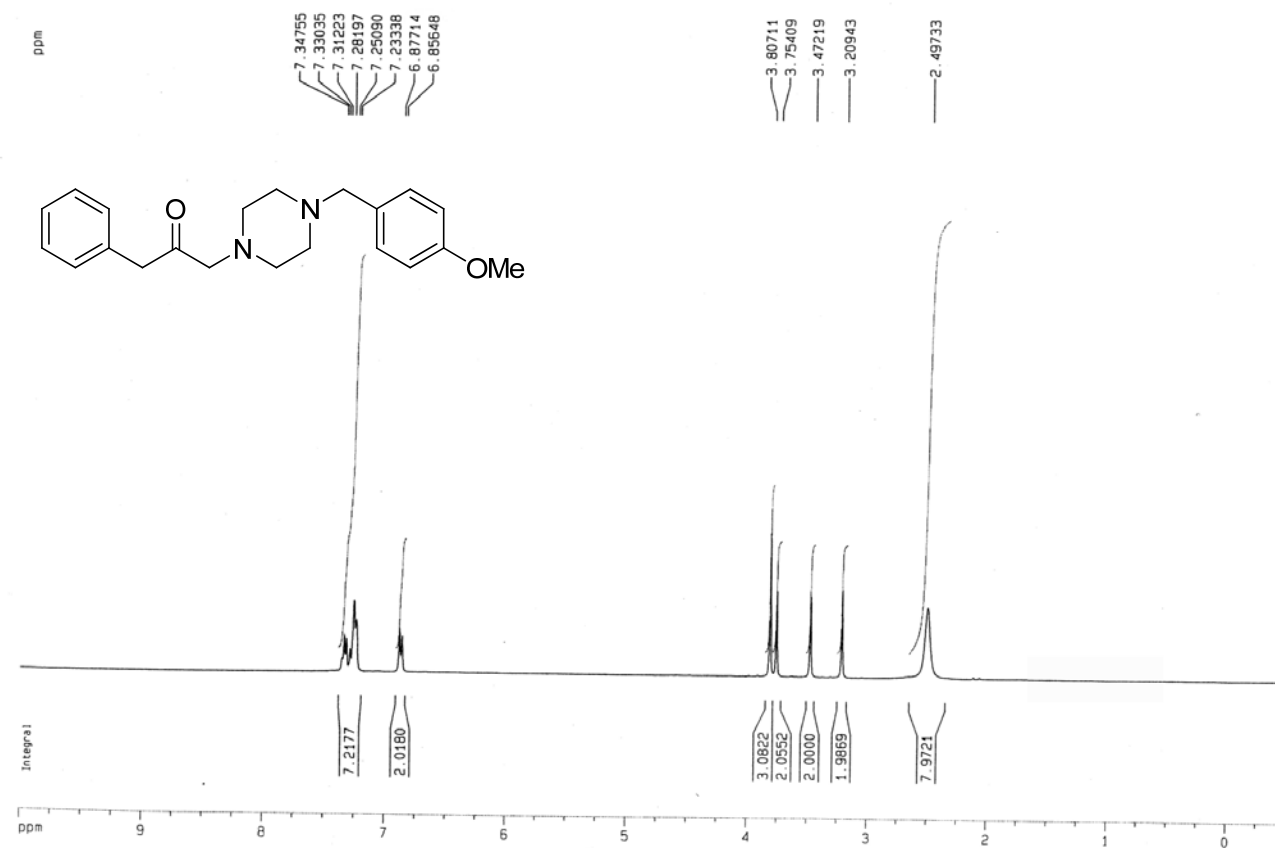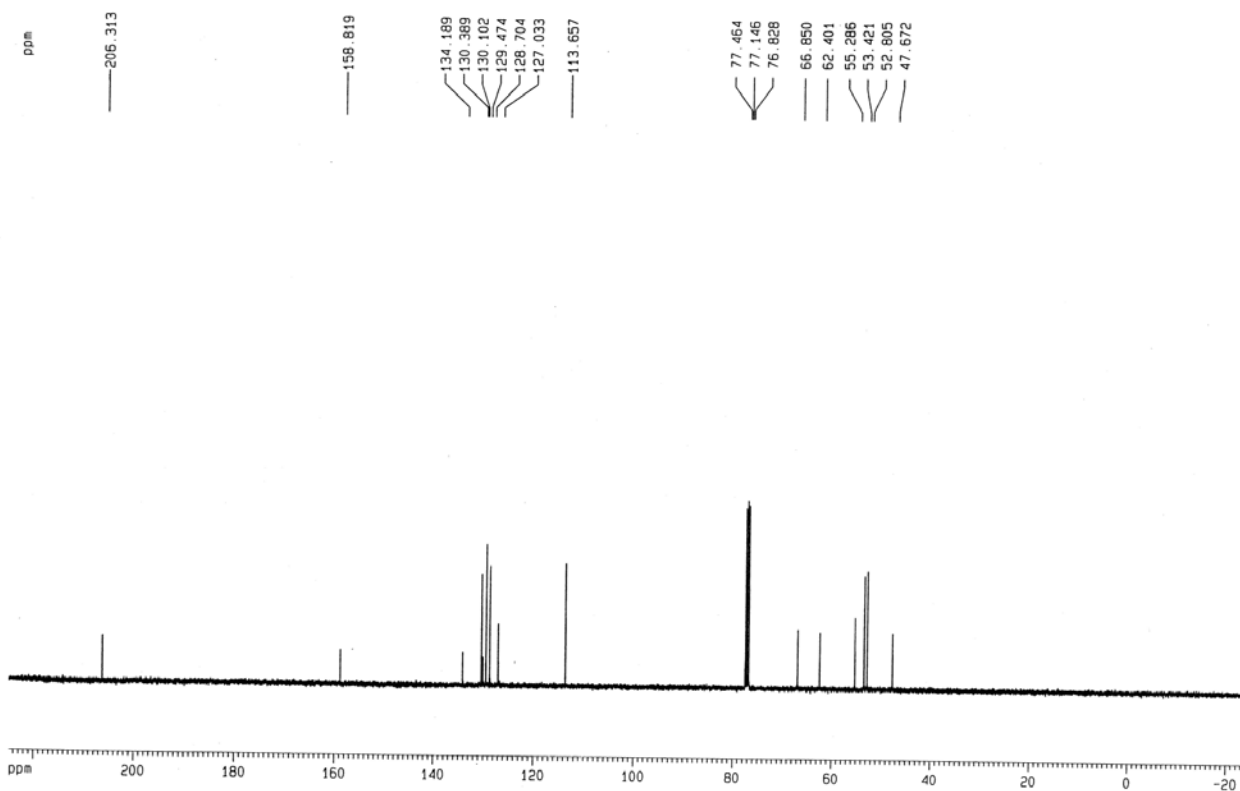

3h

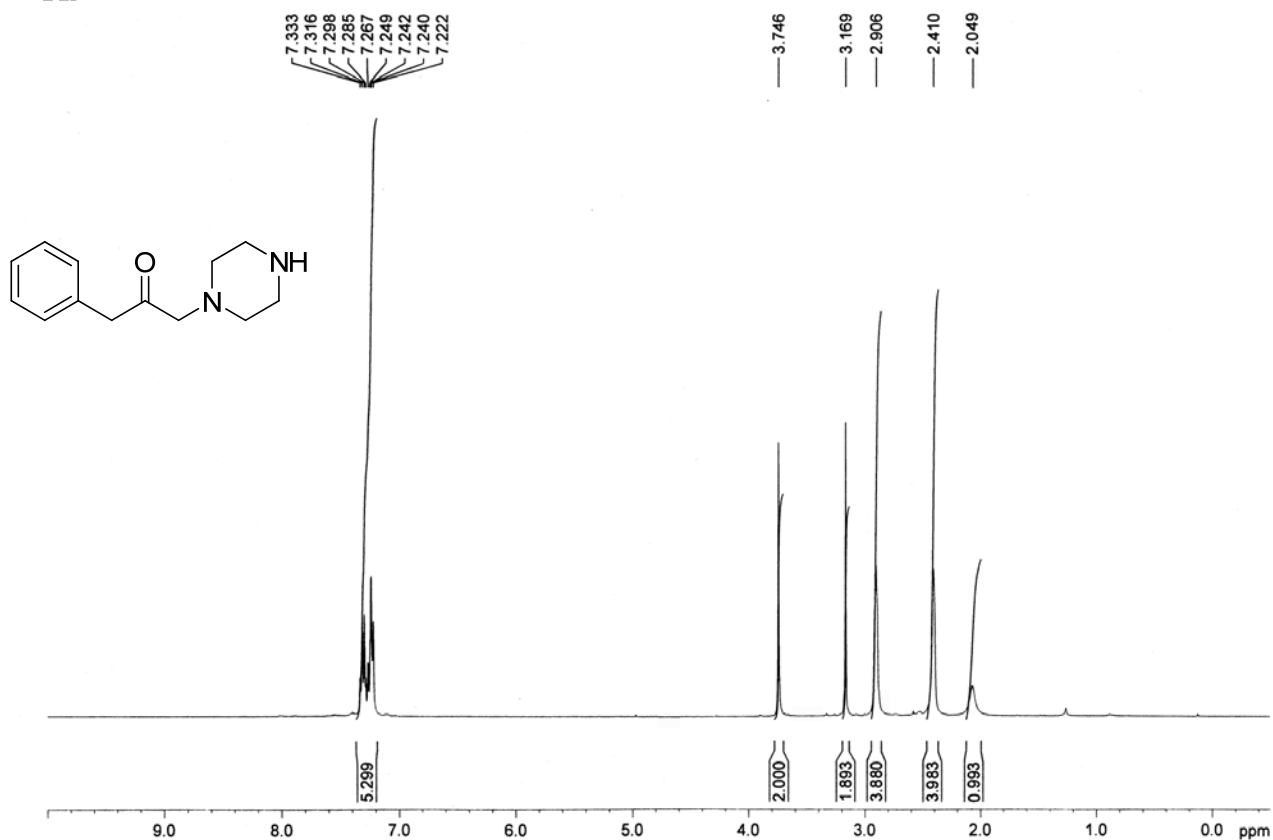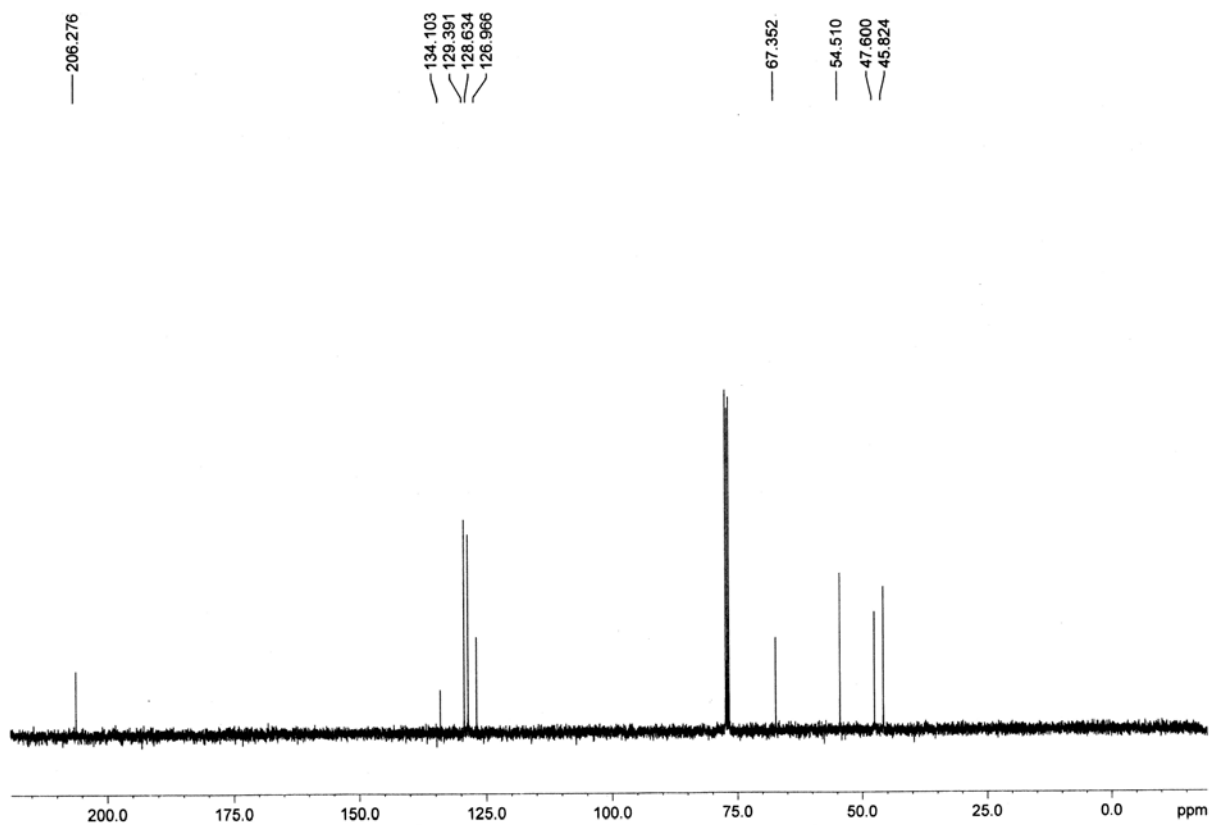

3i

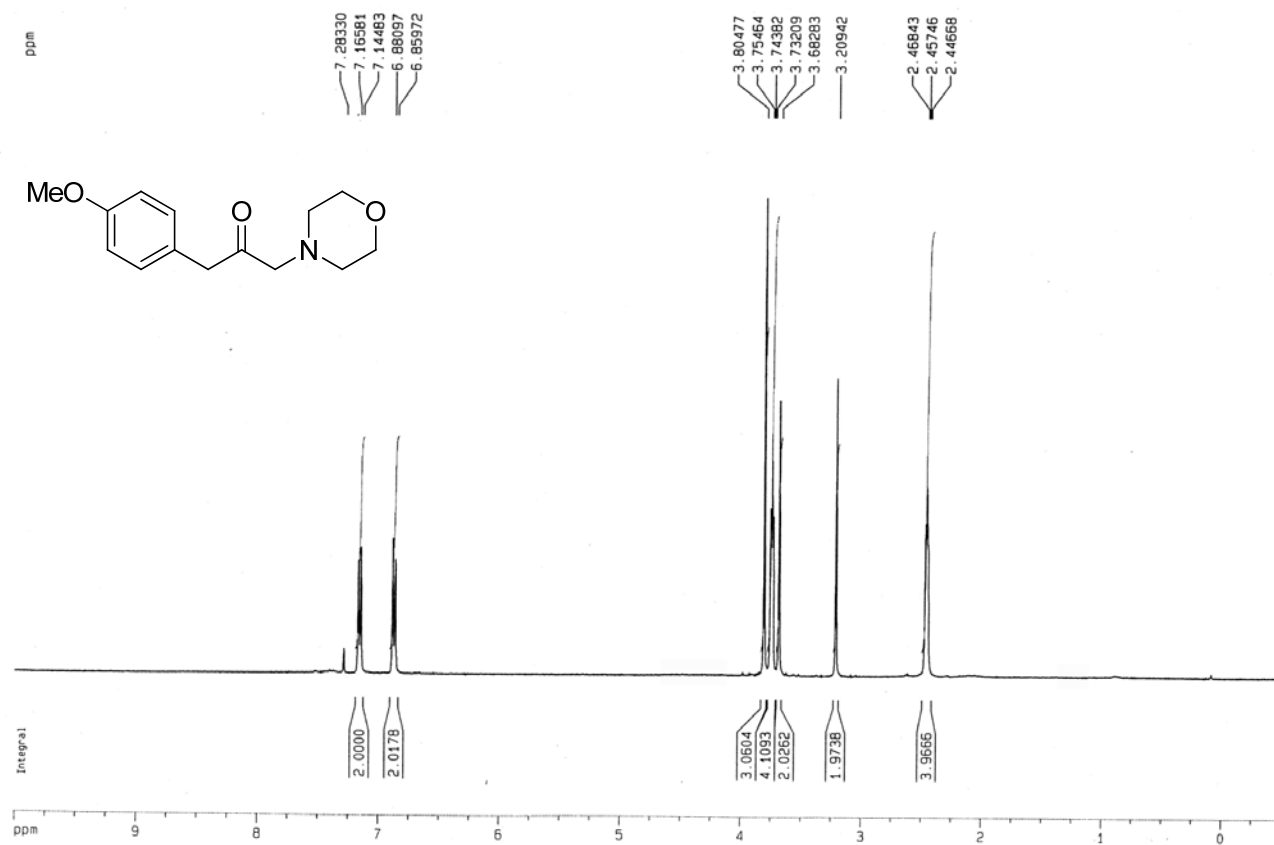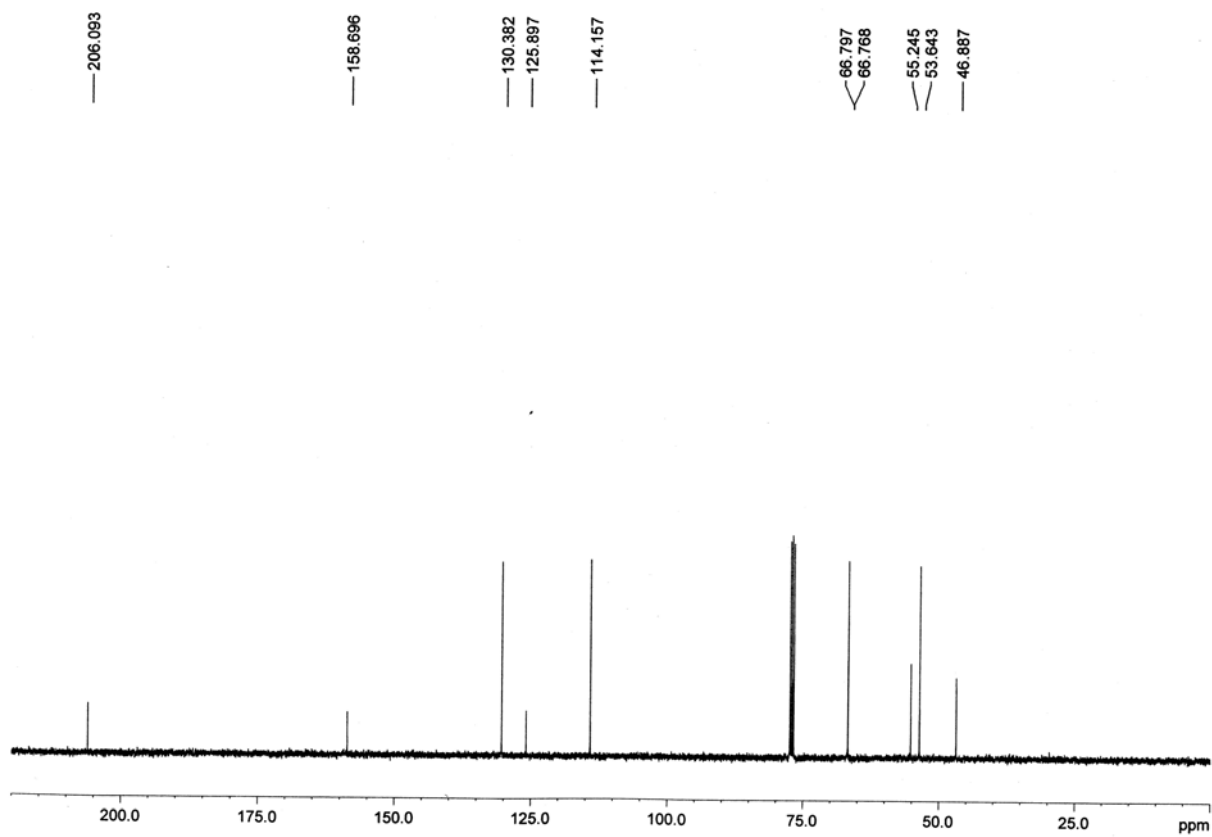

3j

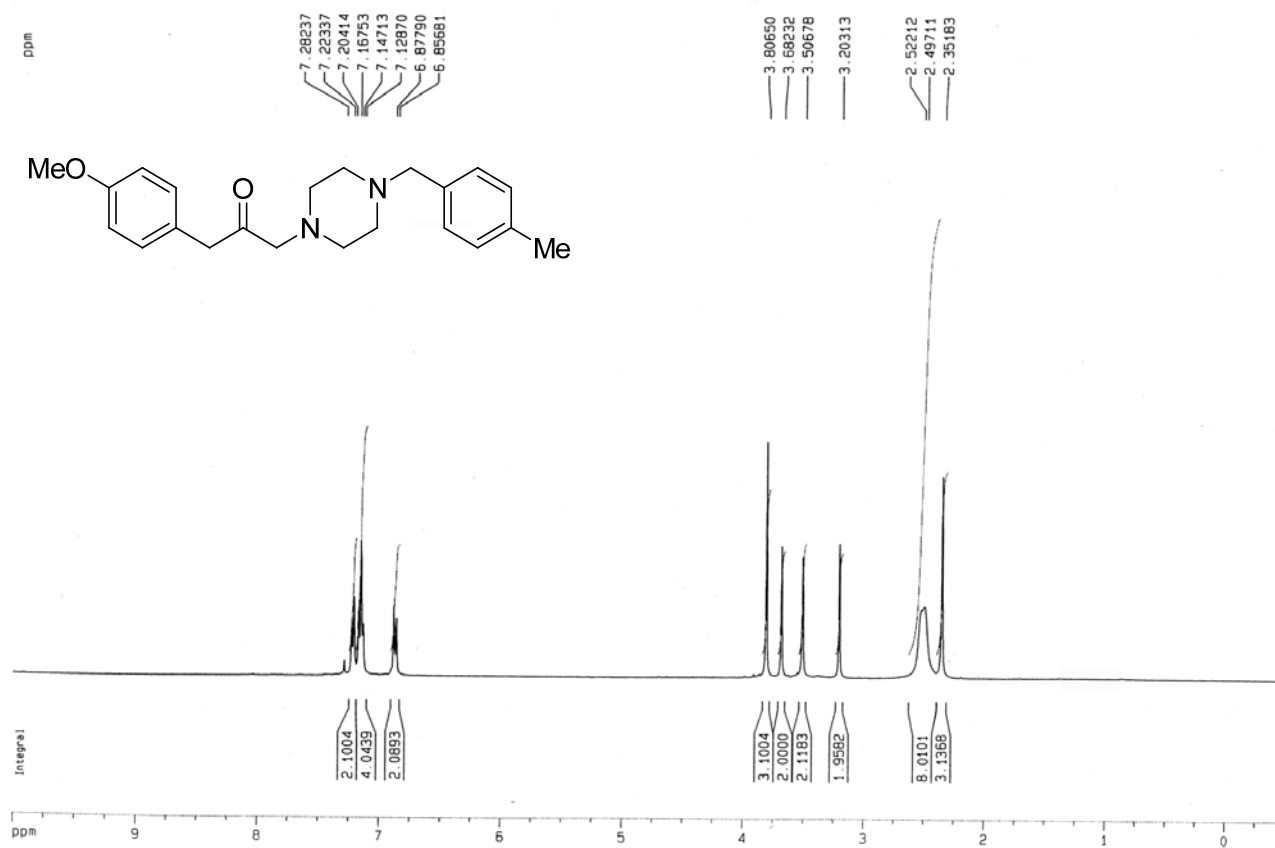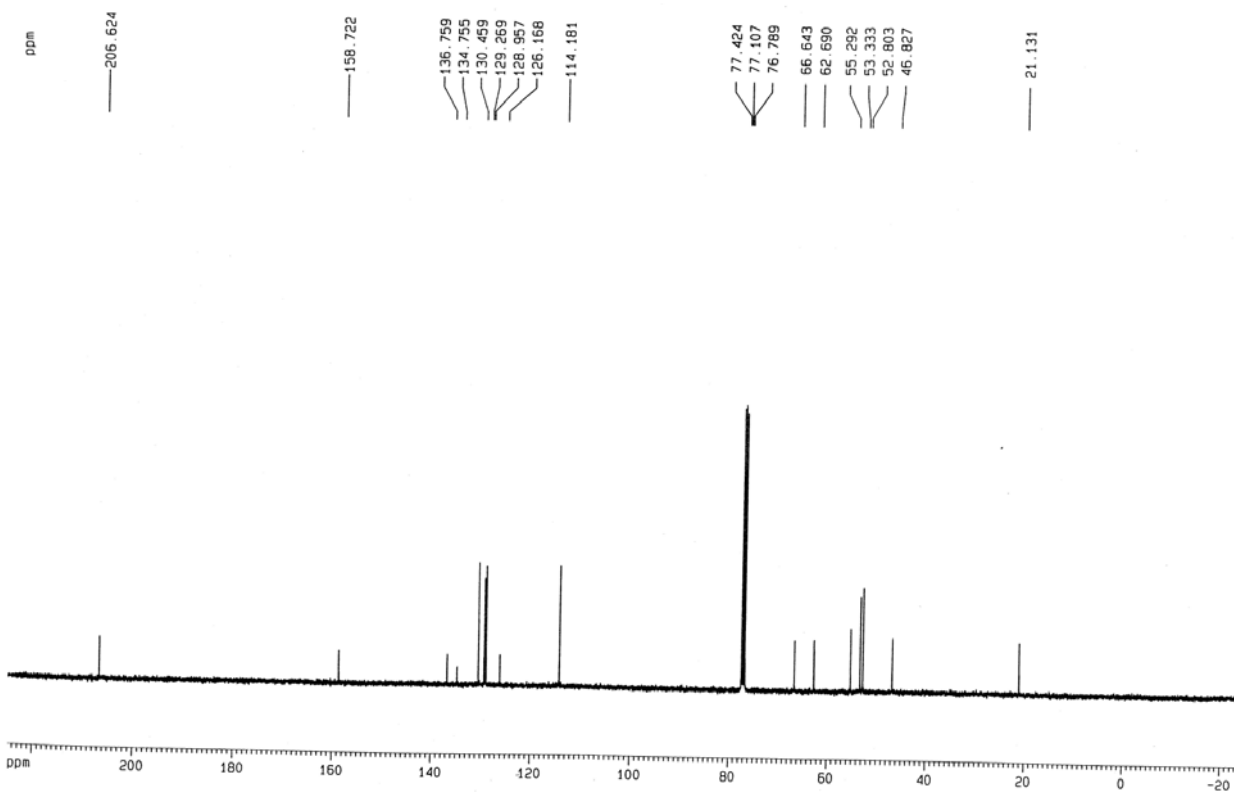

### 3k

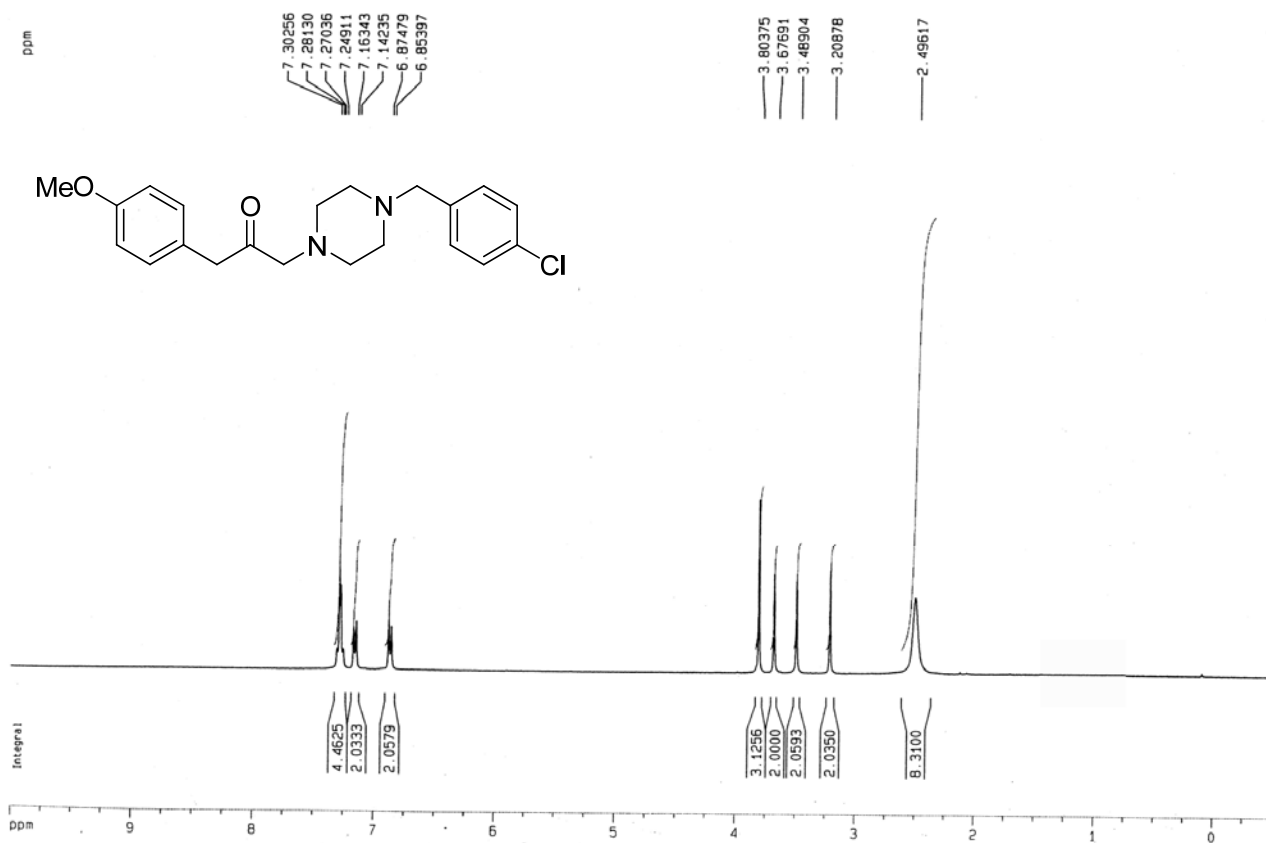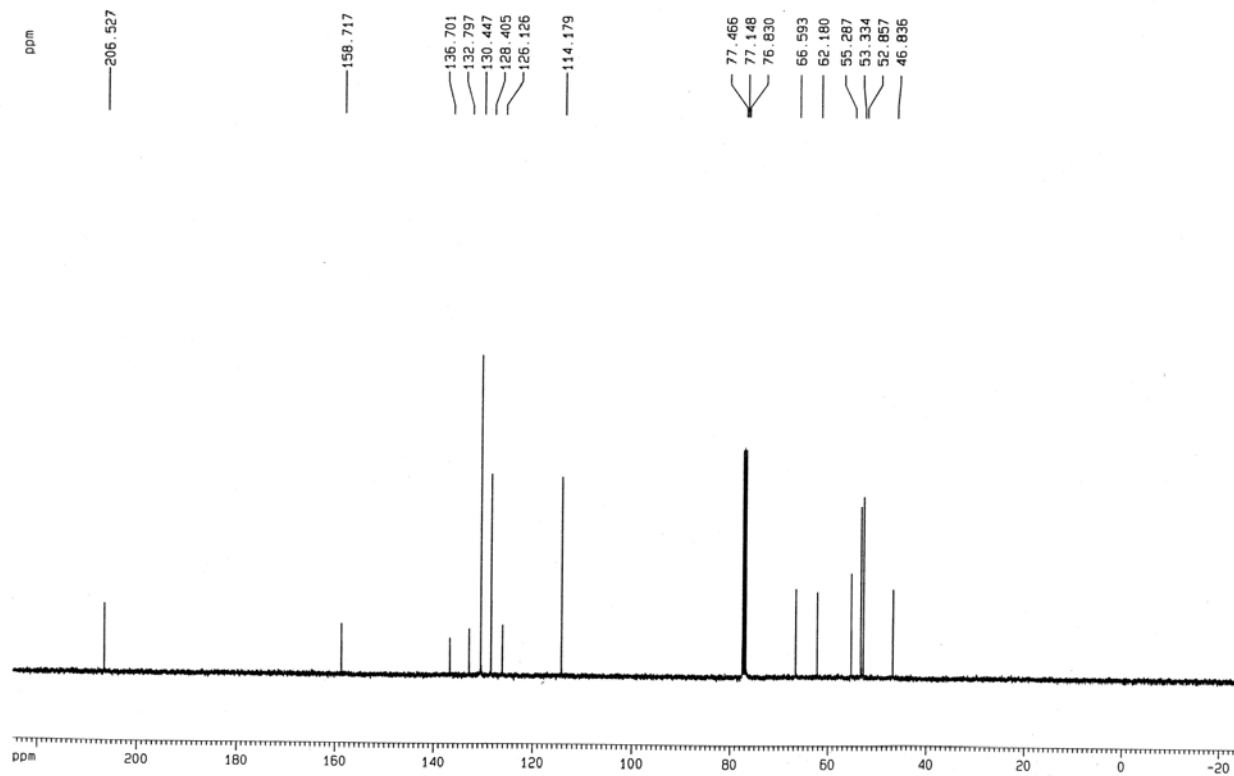

31

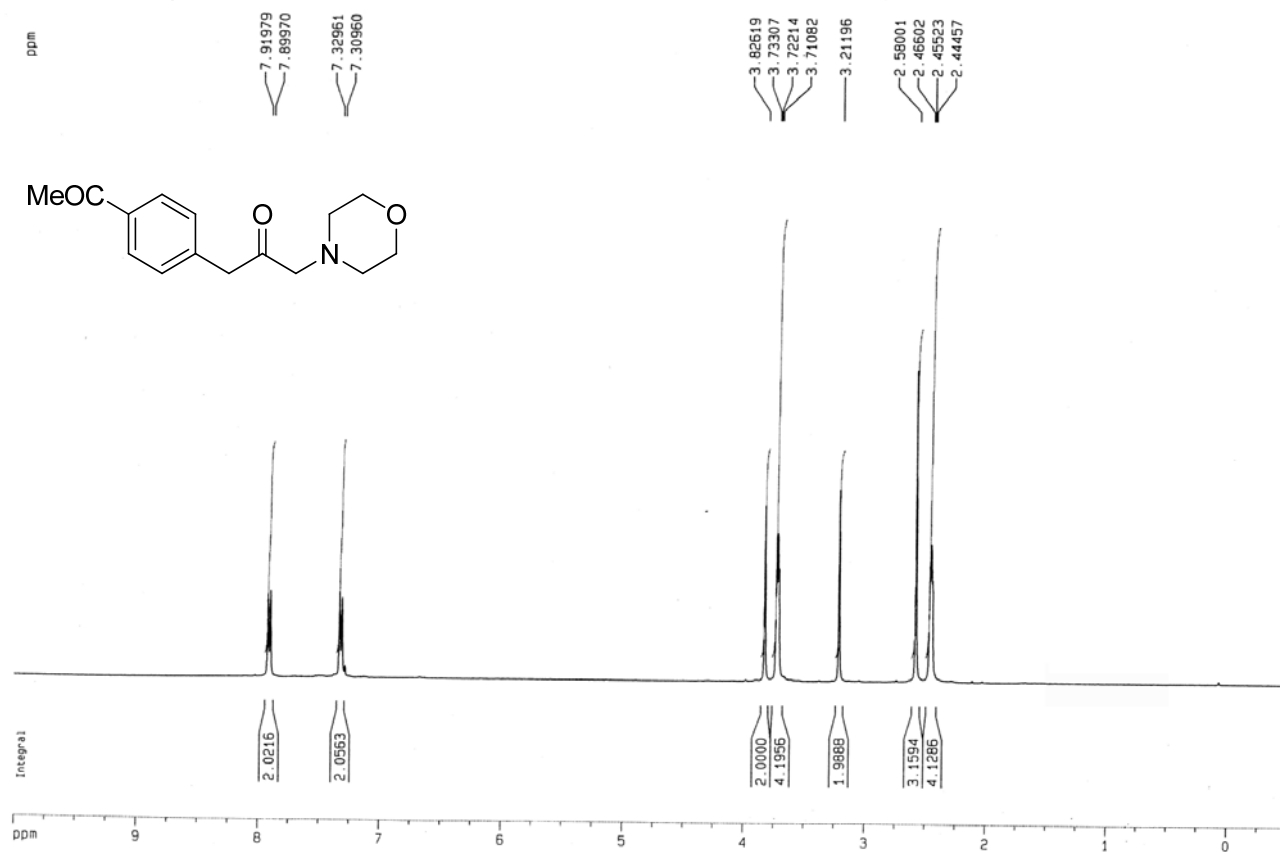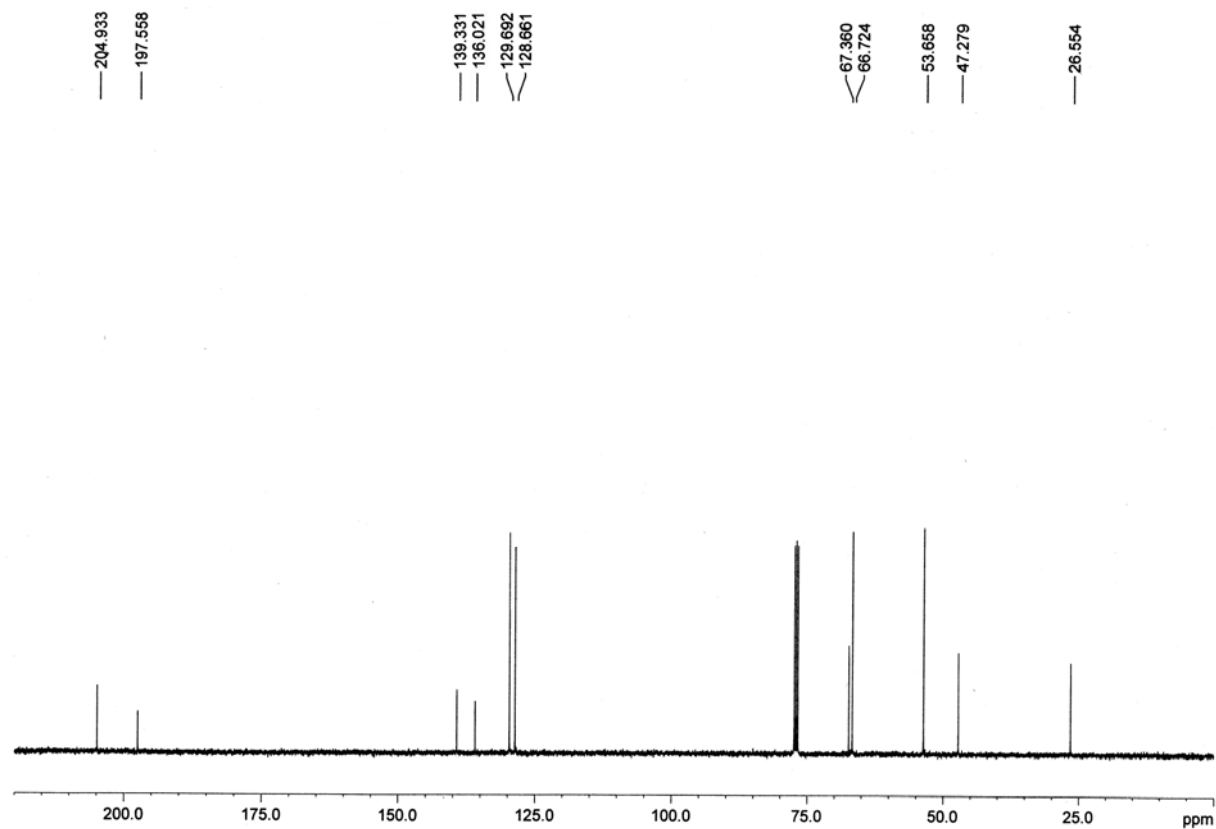

### 3m

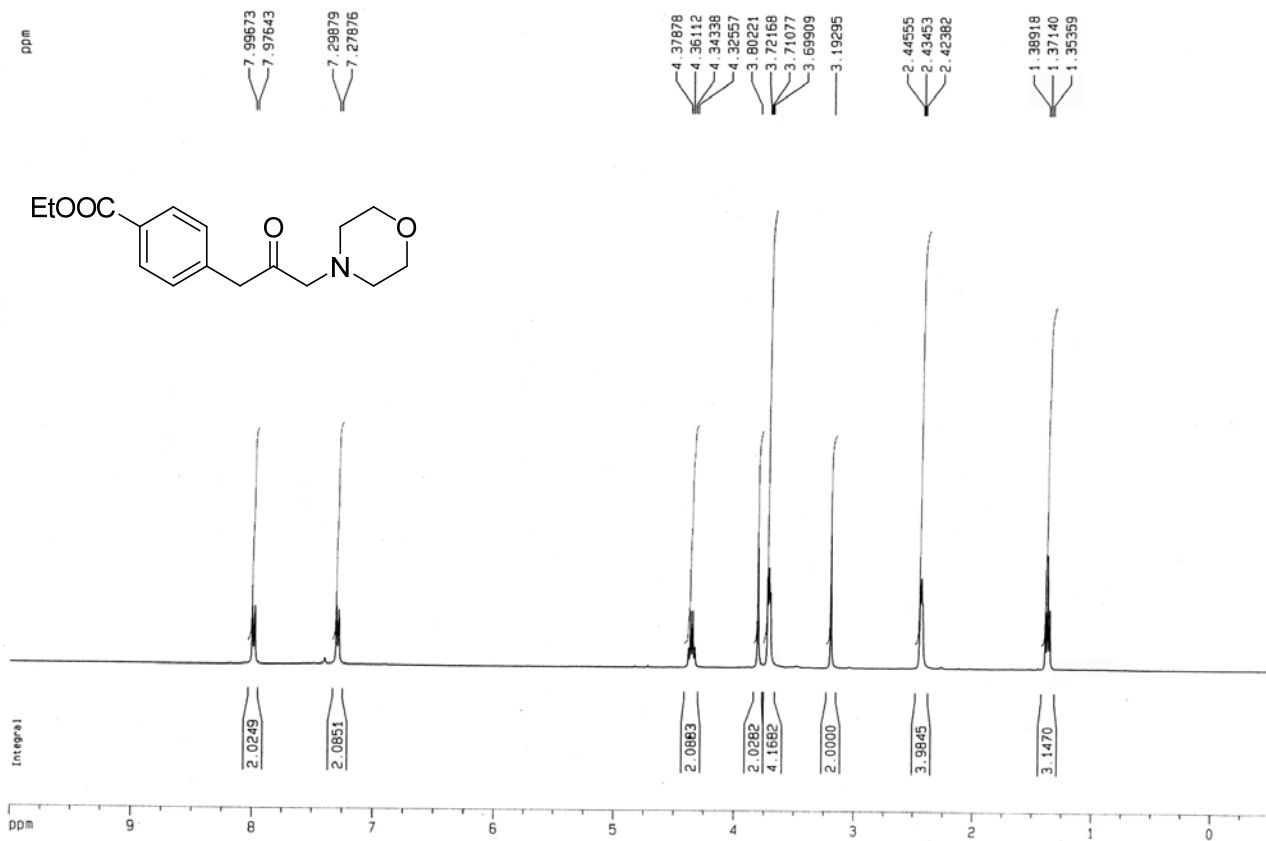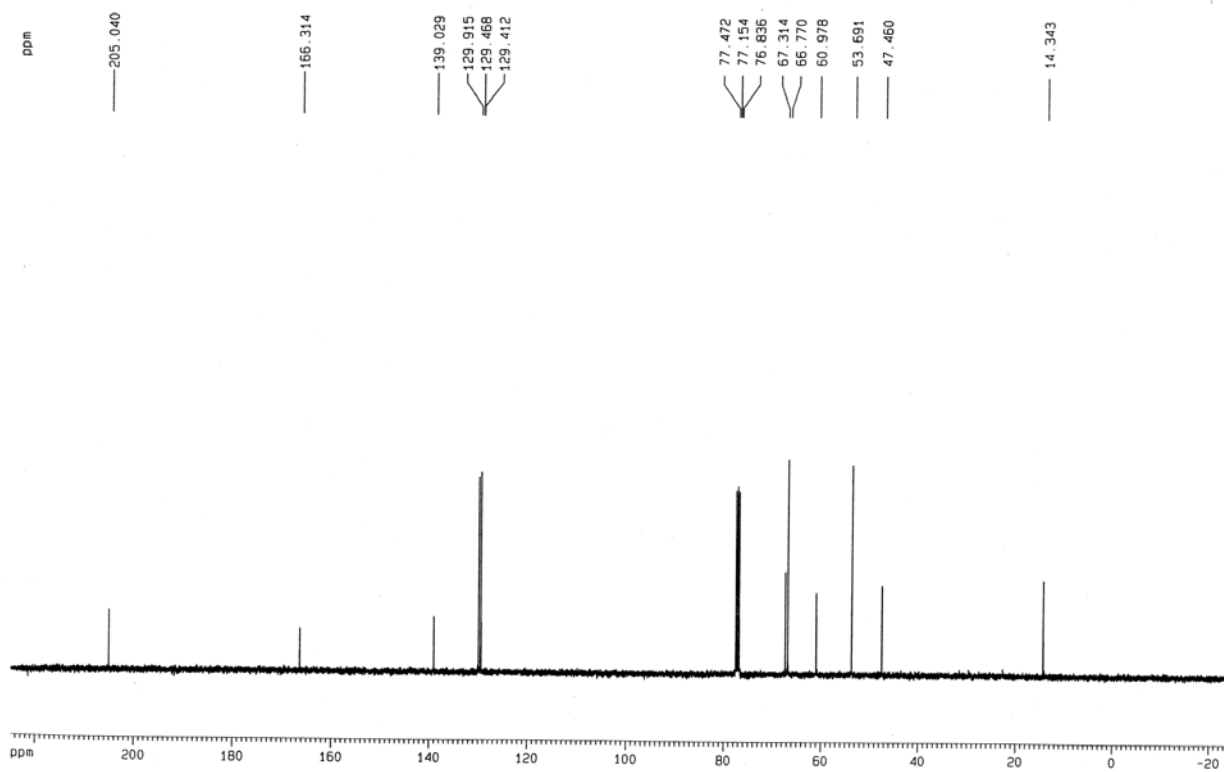

### 3n

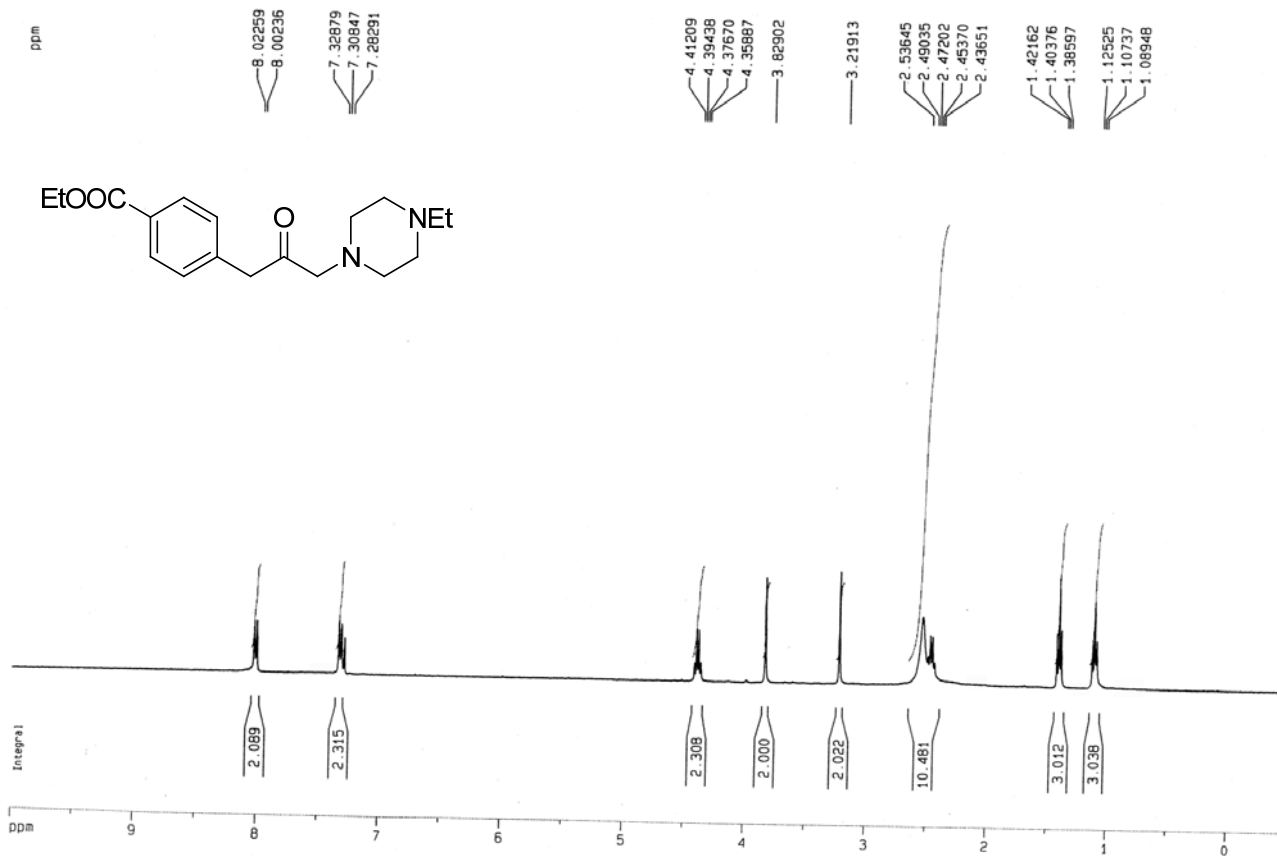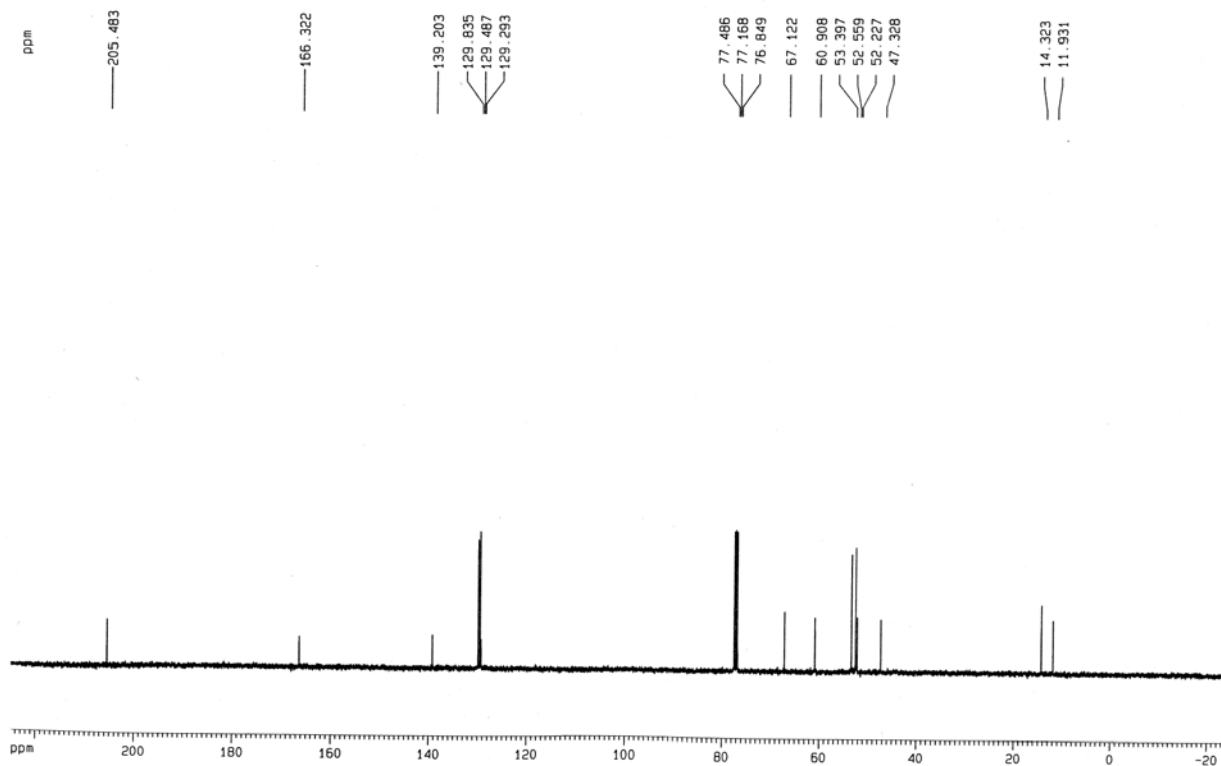



30

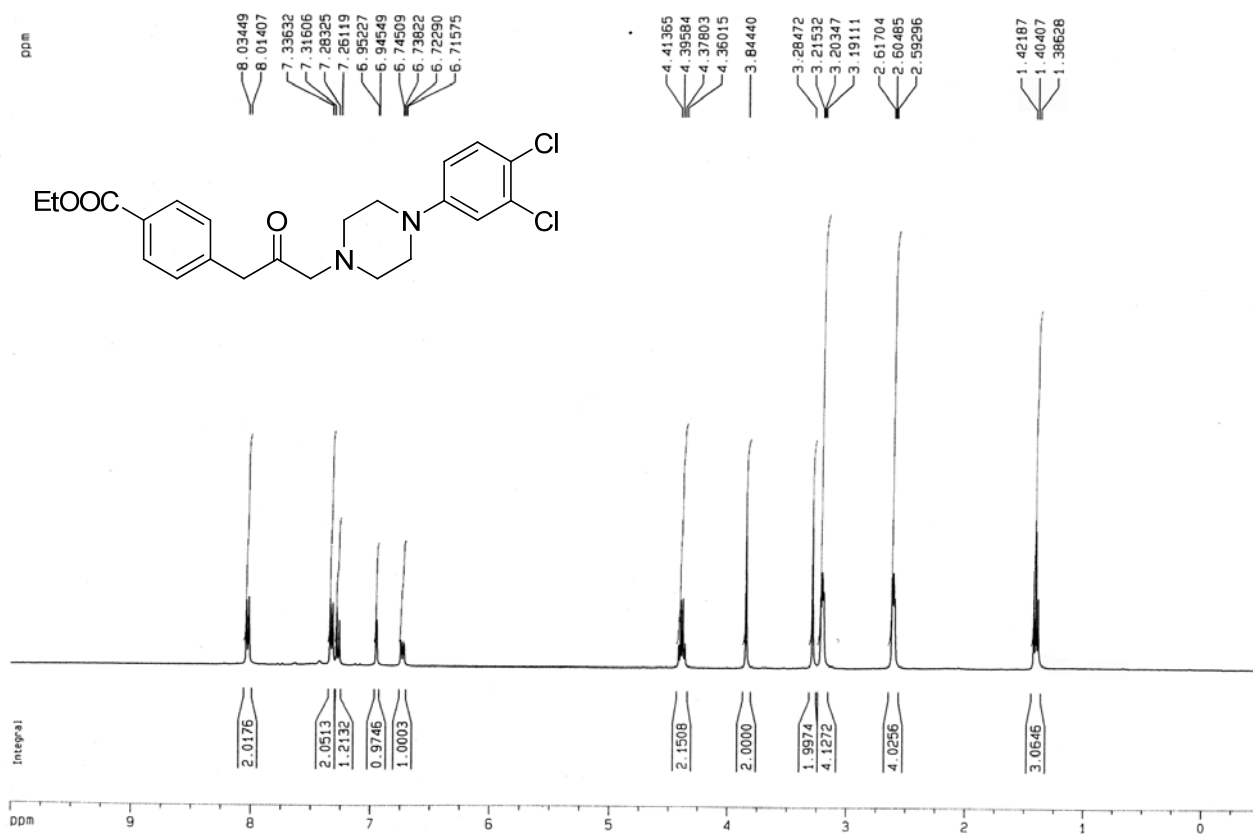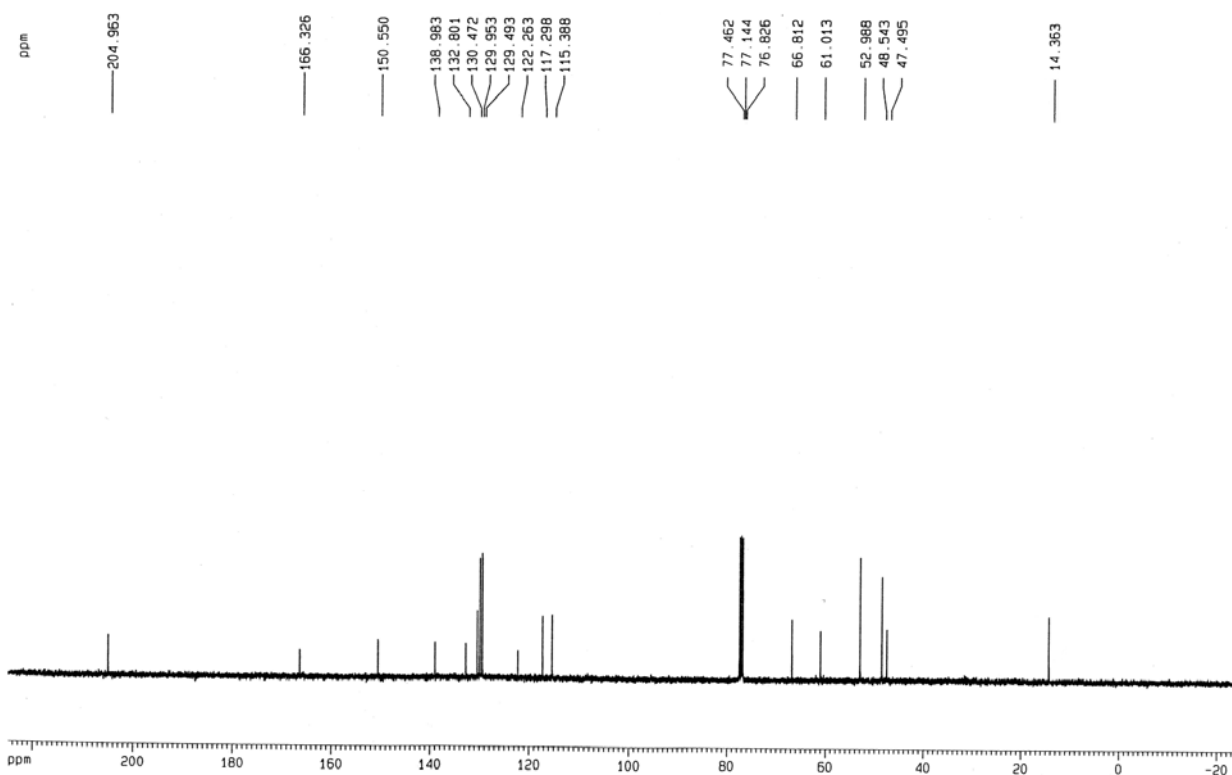

3p

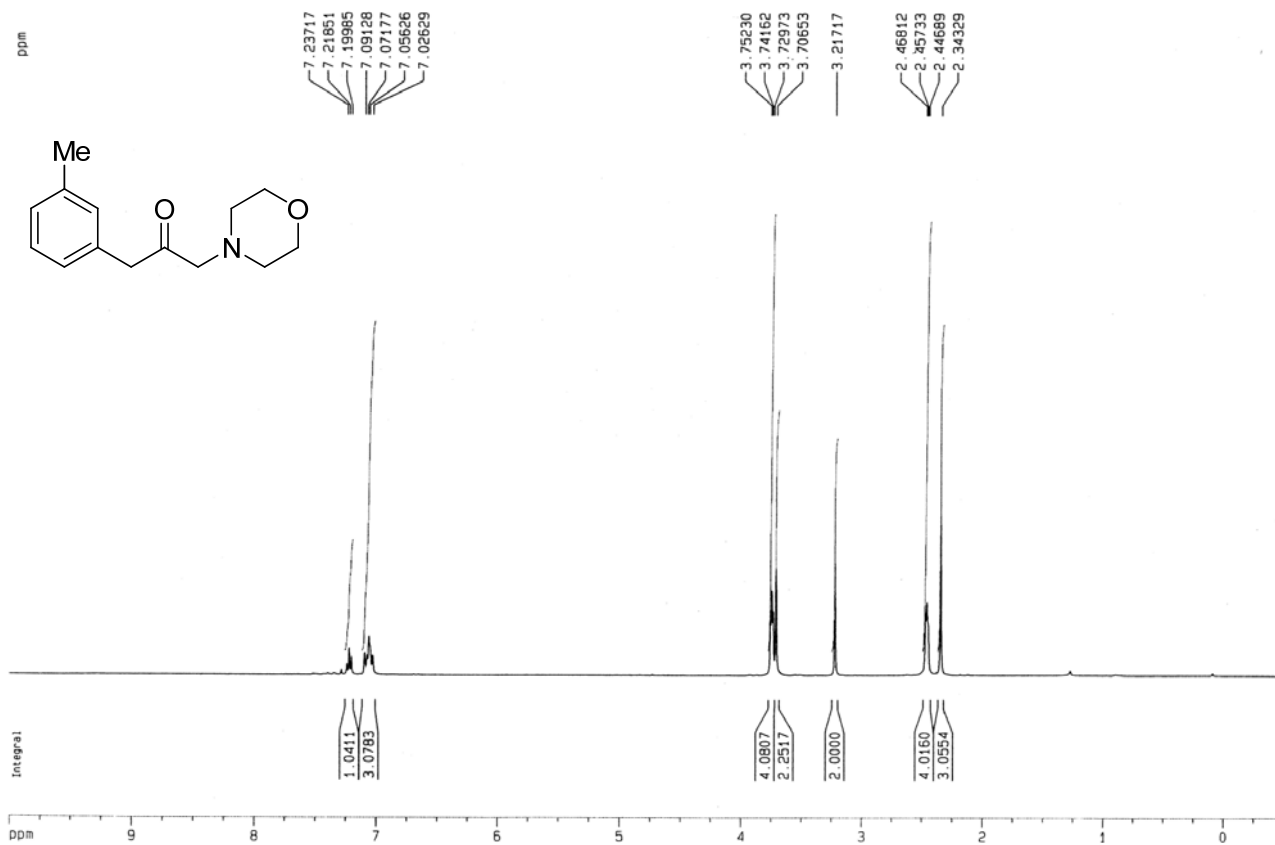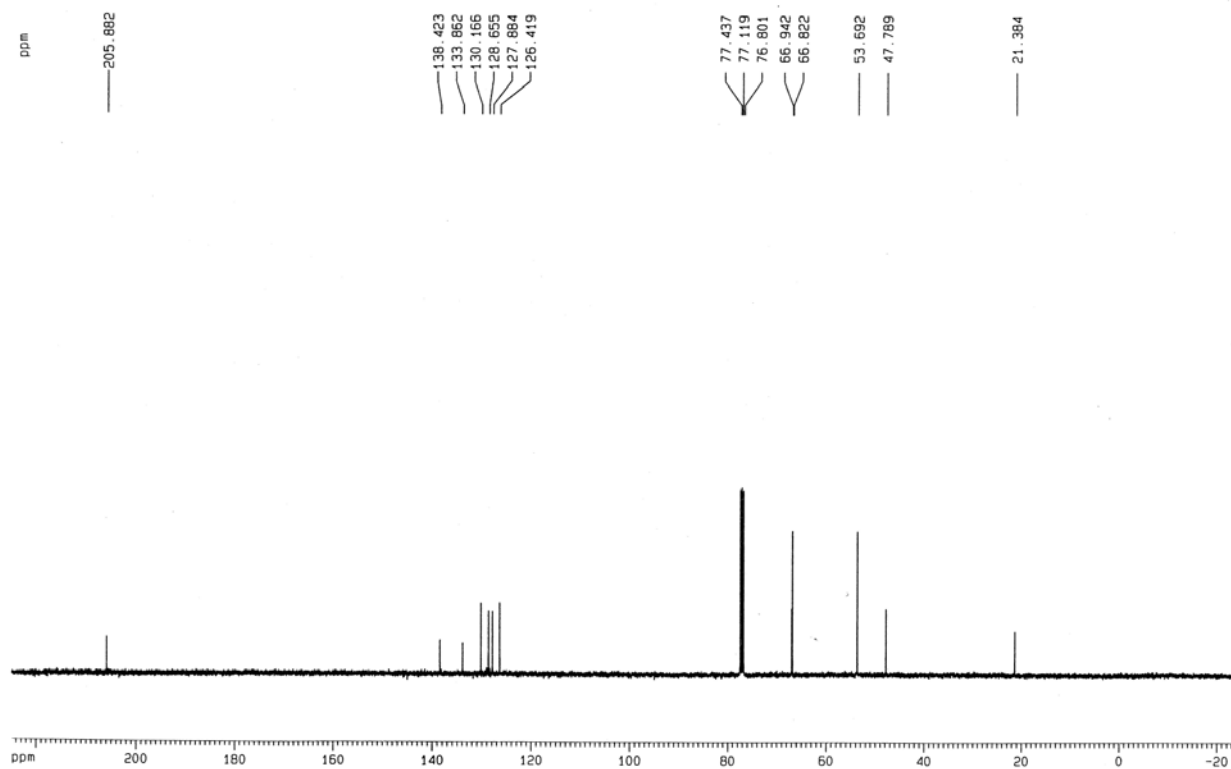

7a

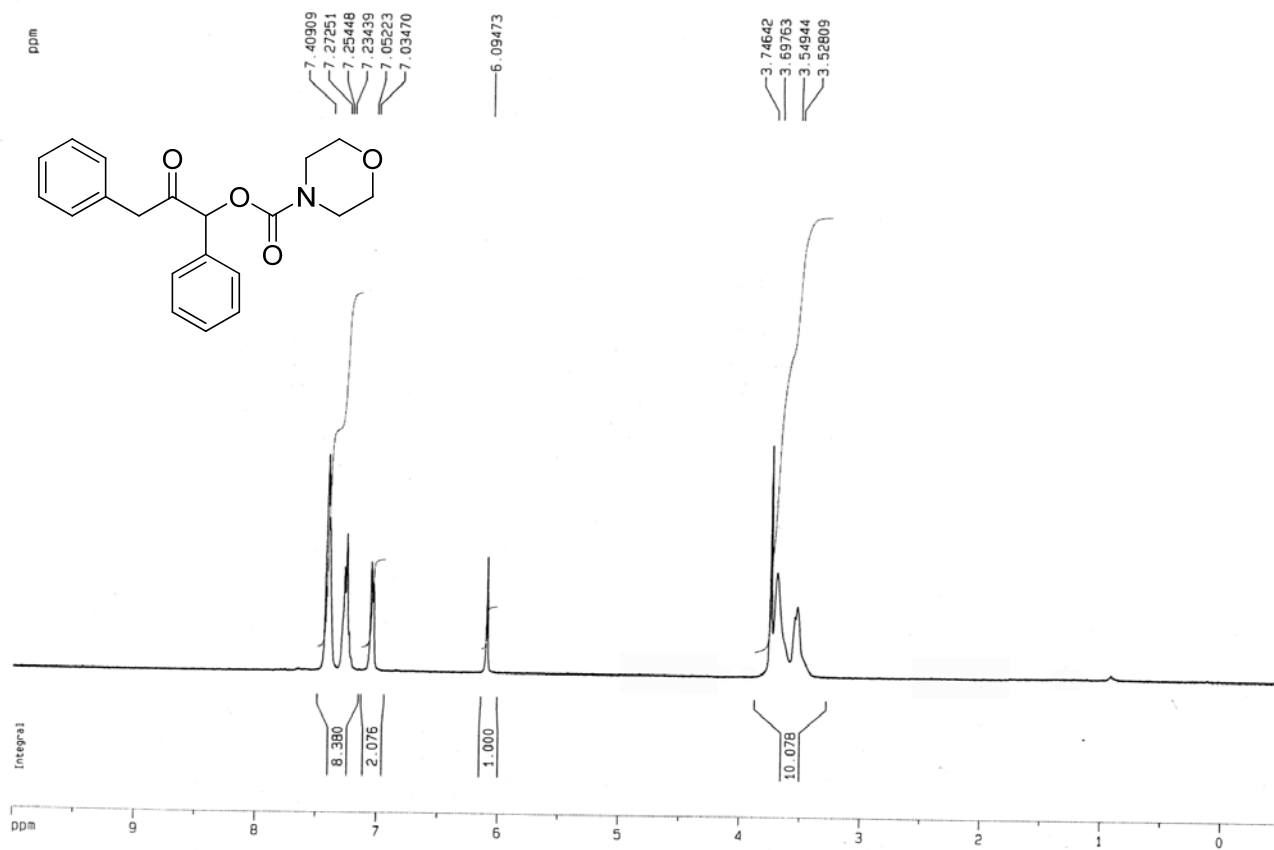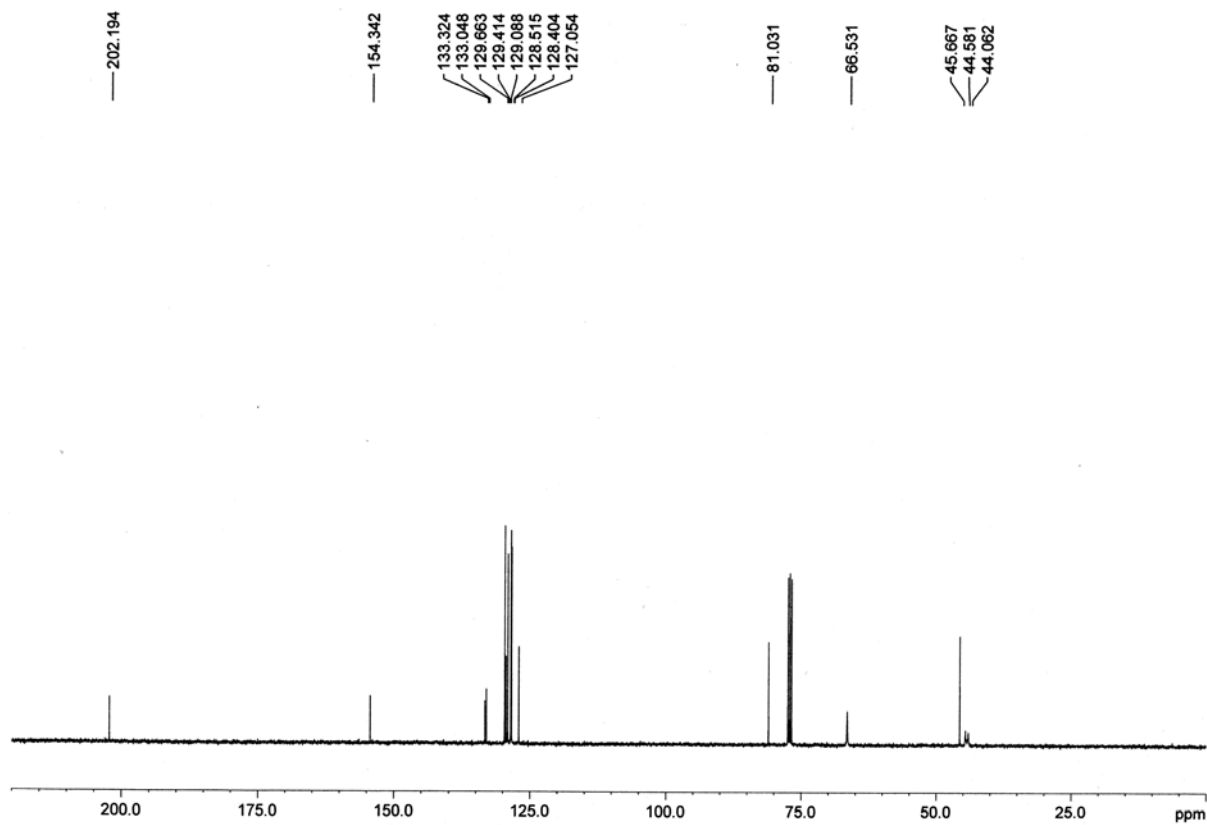

### 7q + 7q'

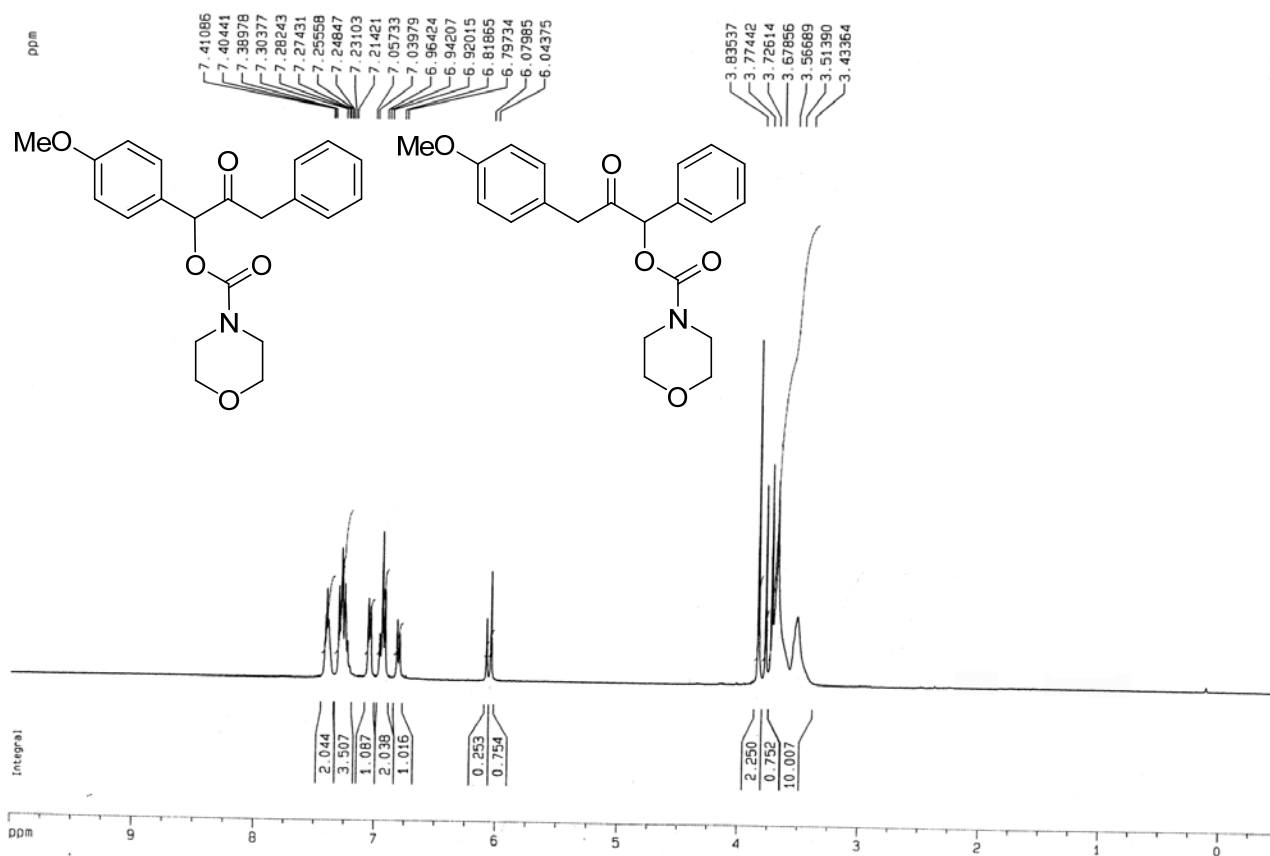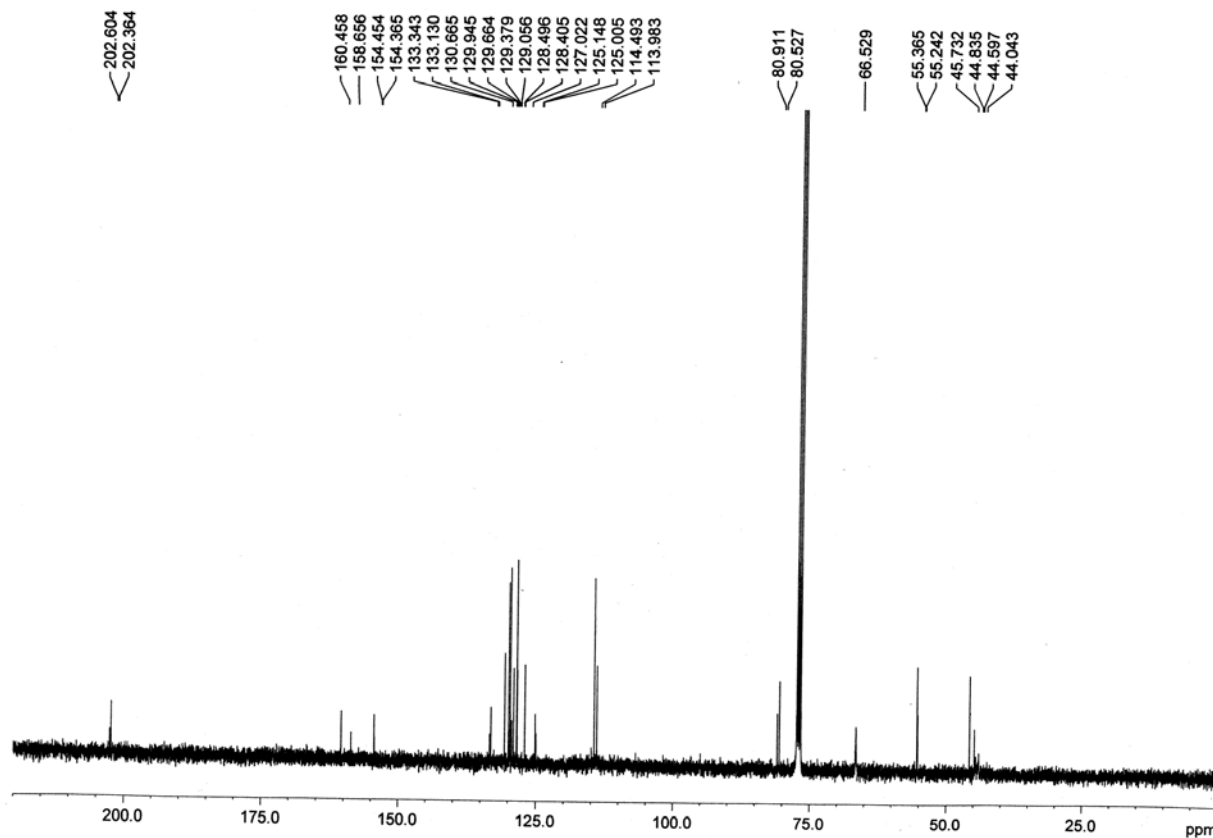

7r

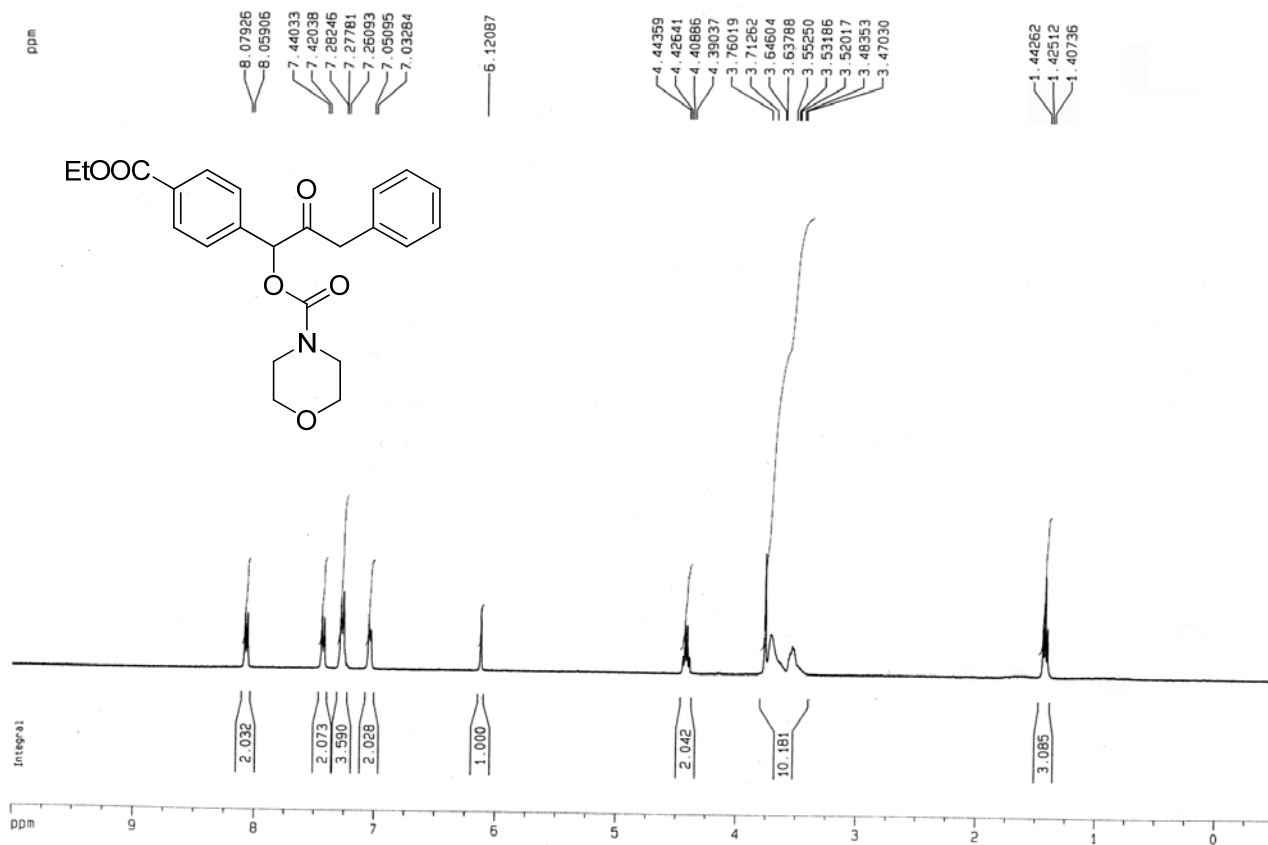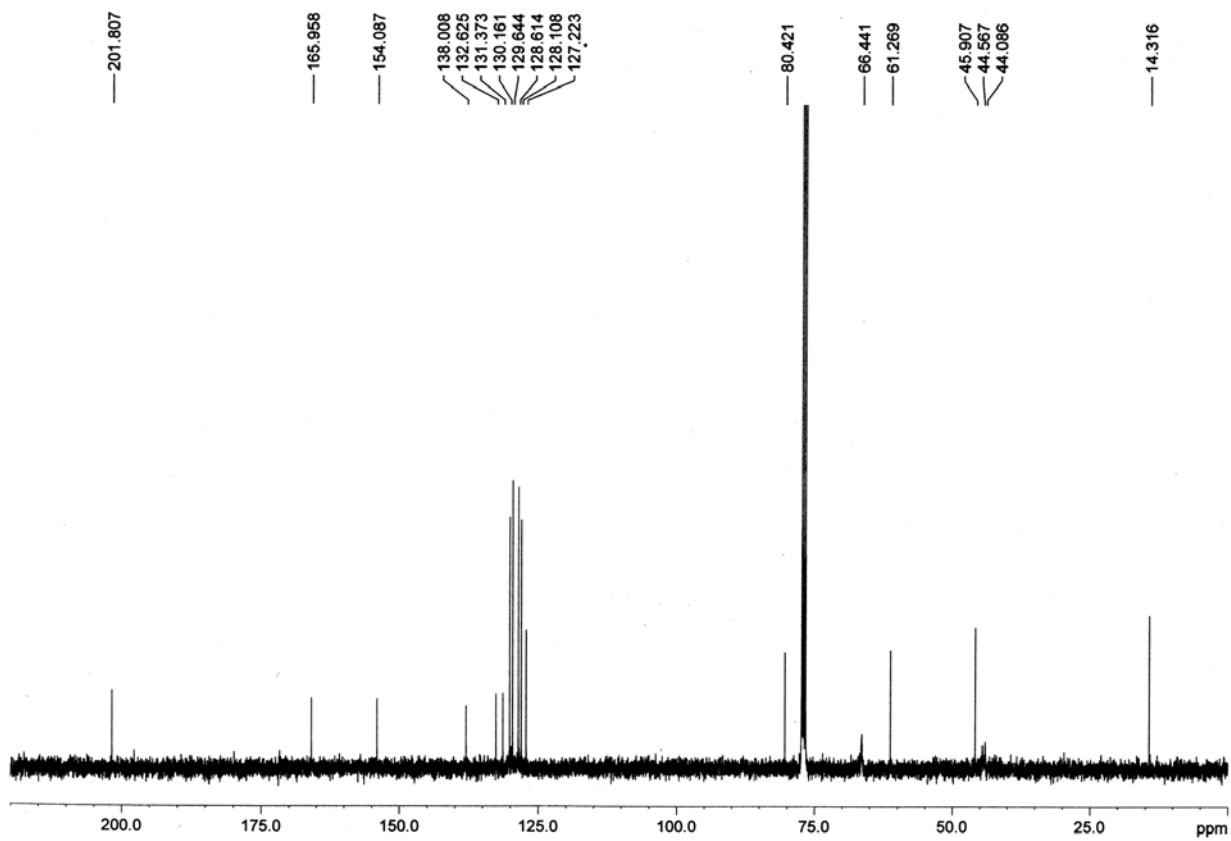

7r'

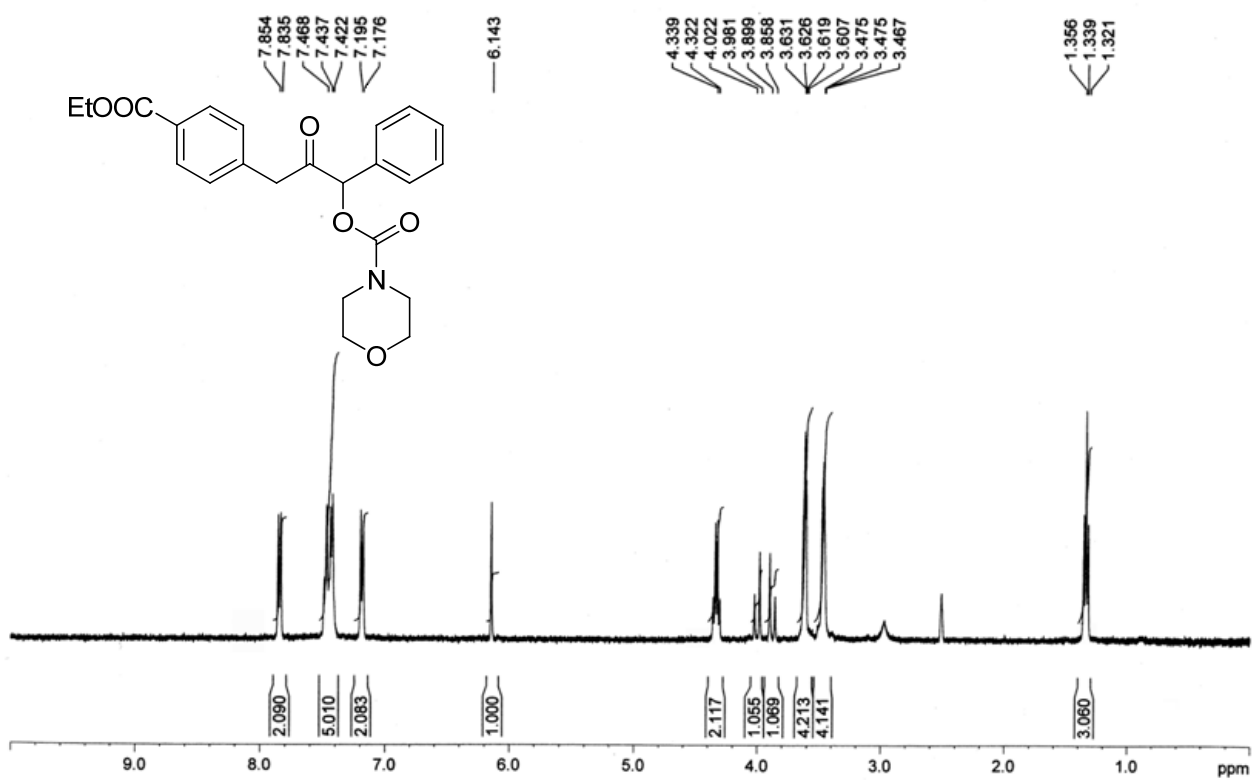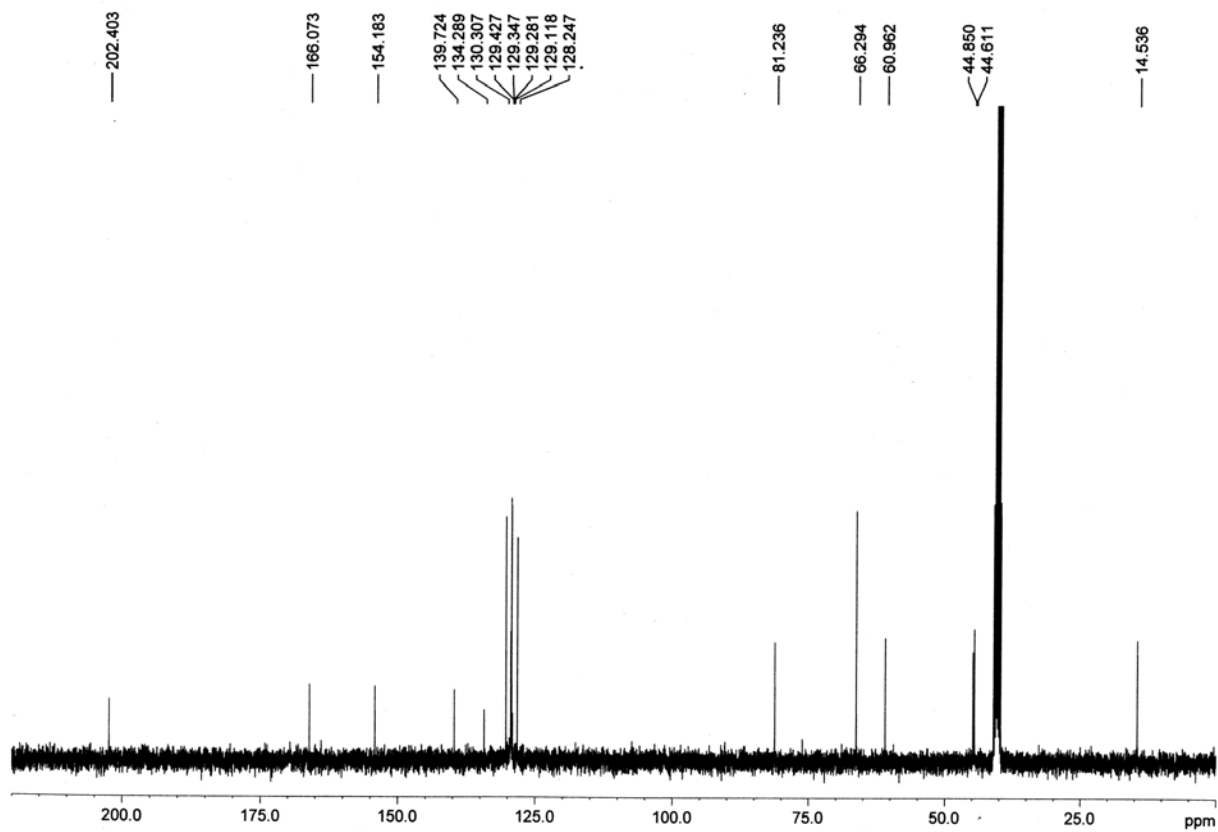

7s

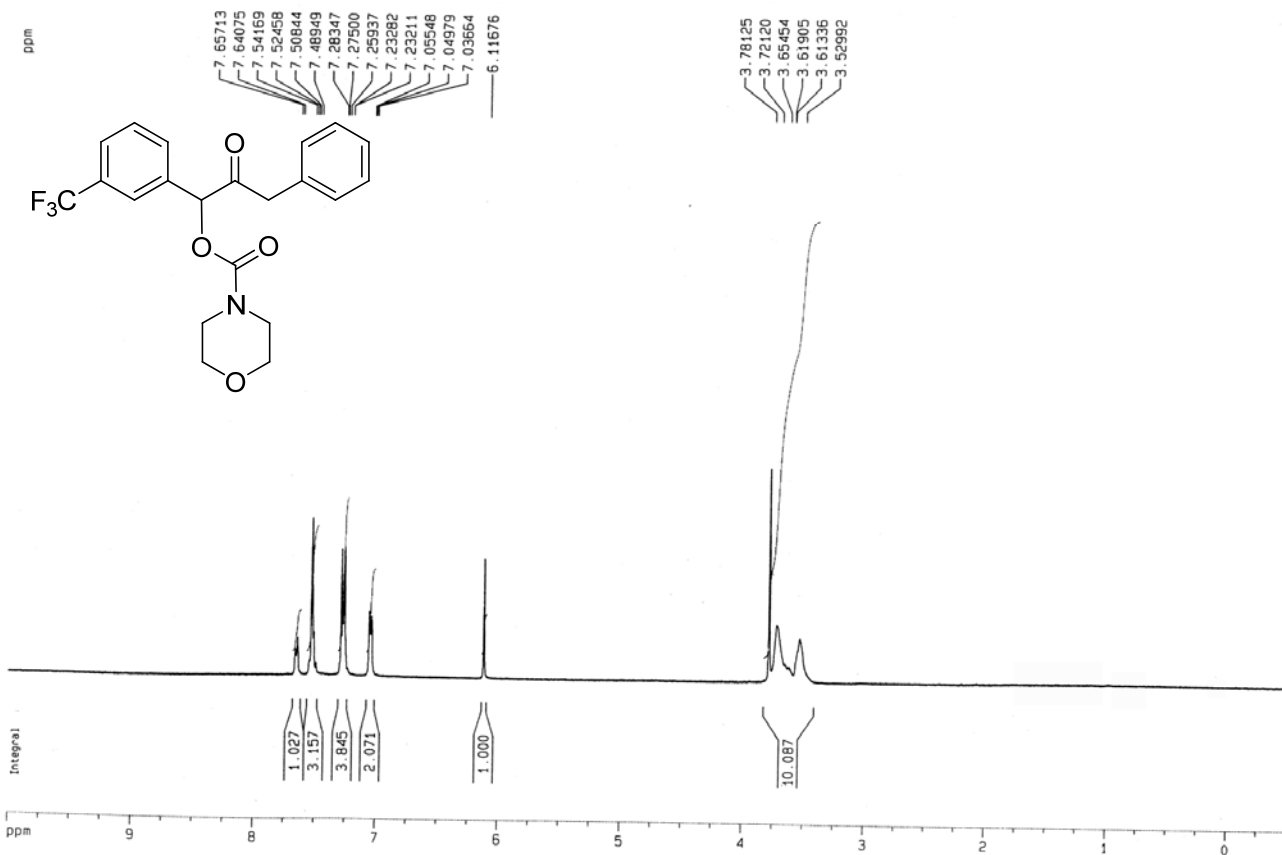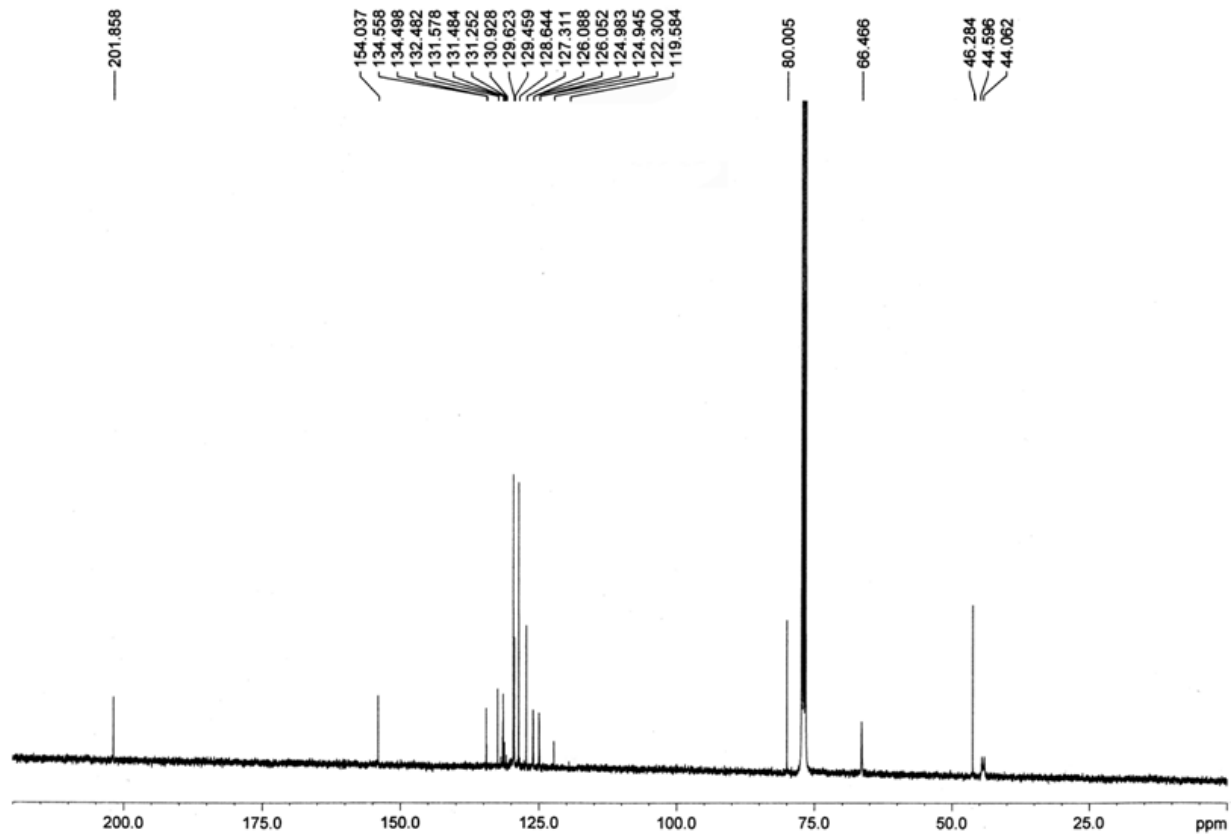

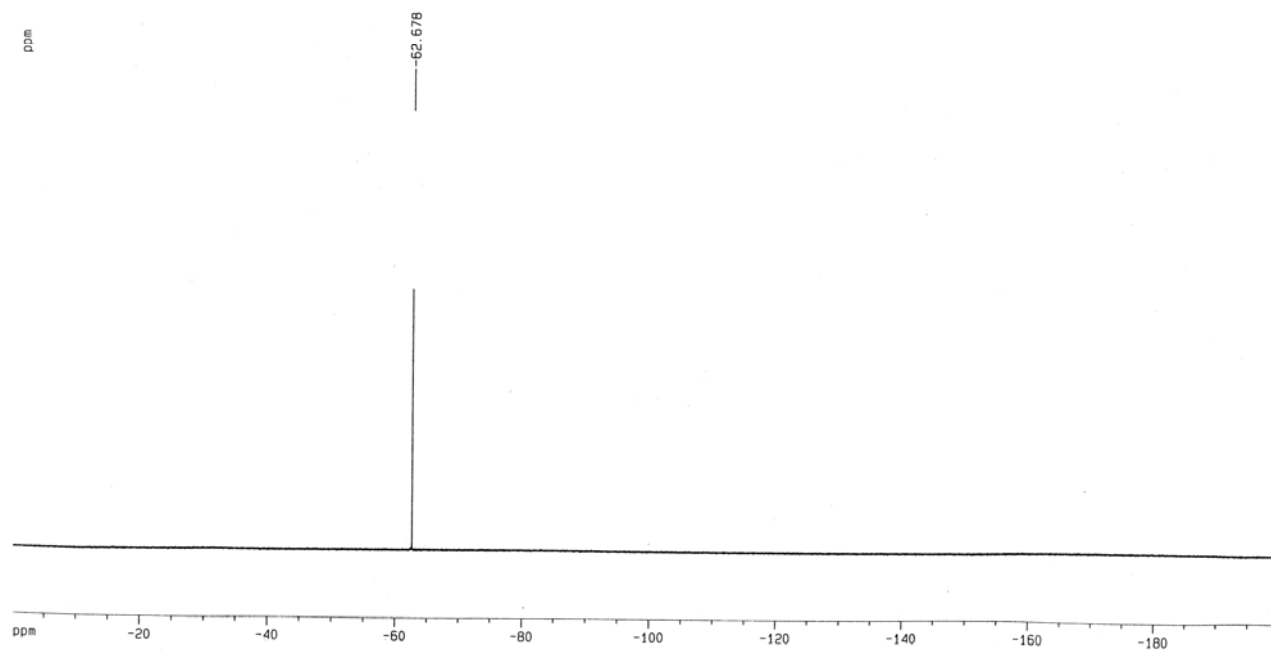



7s'

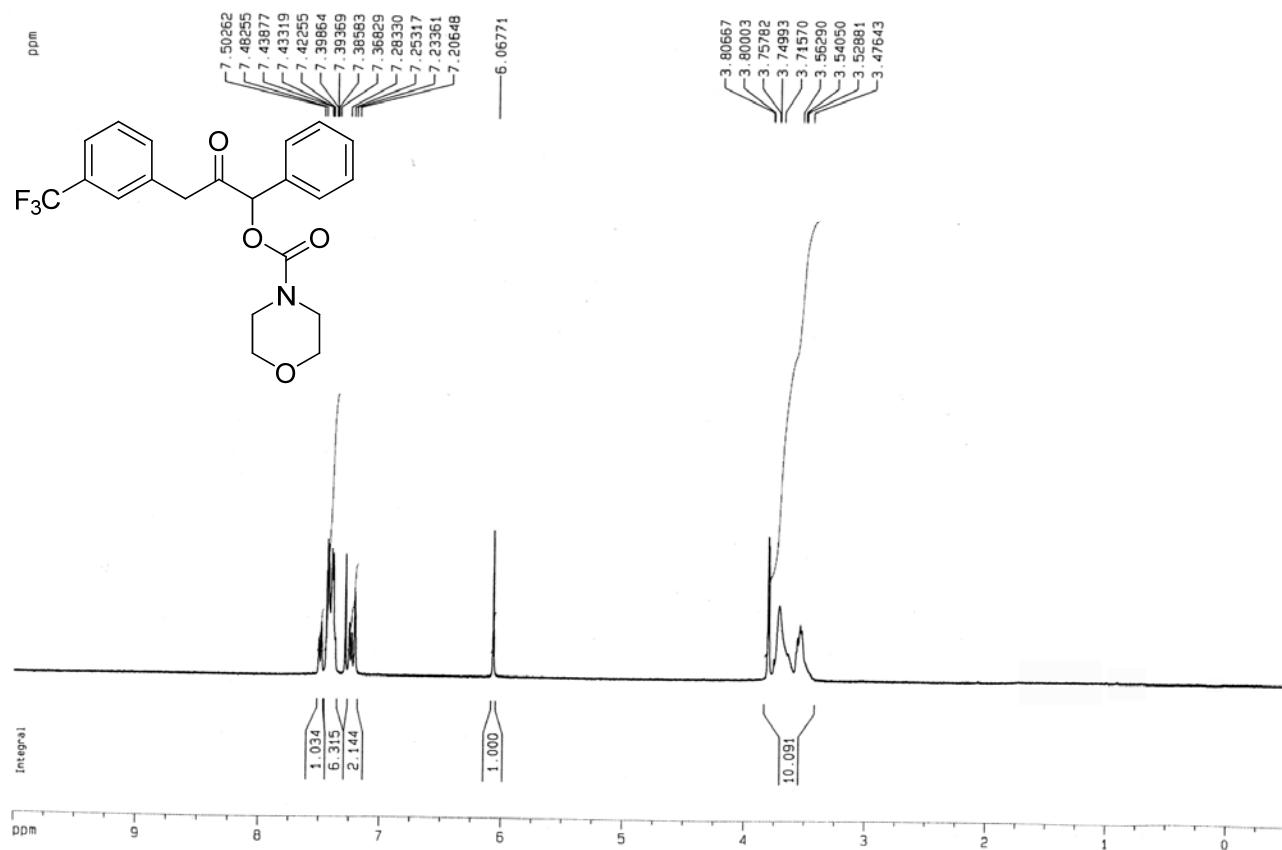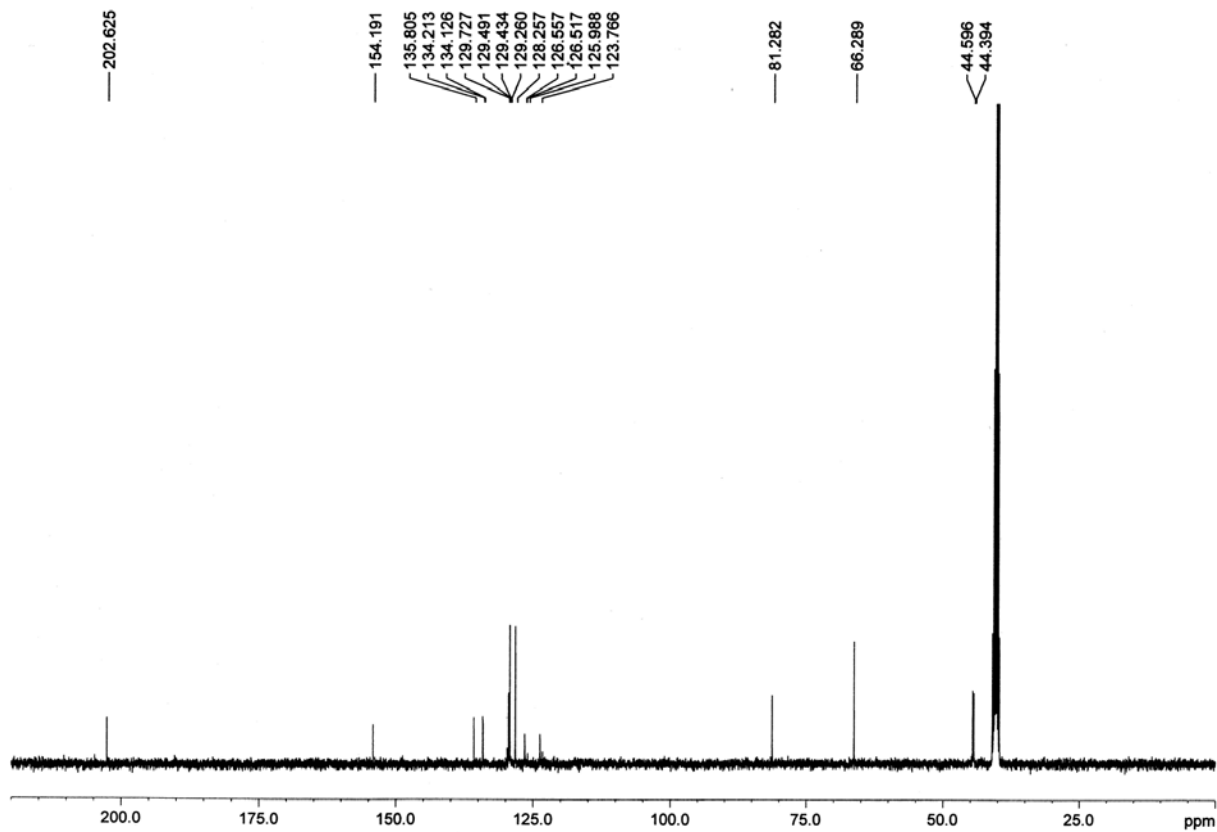

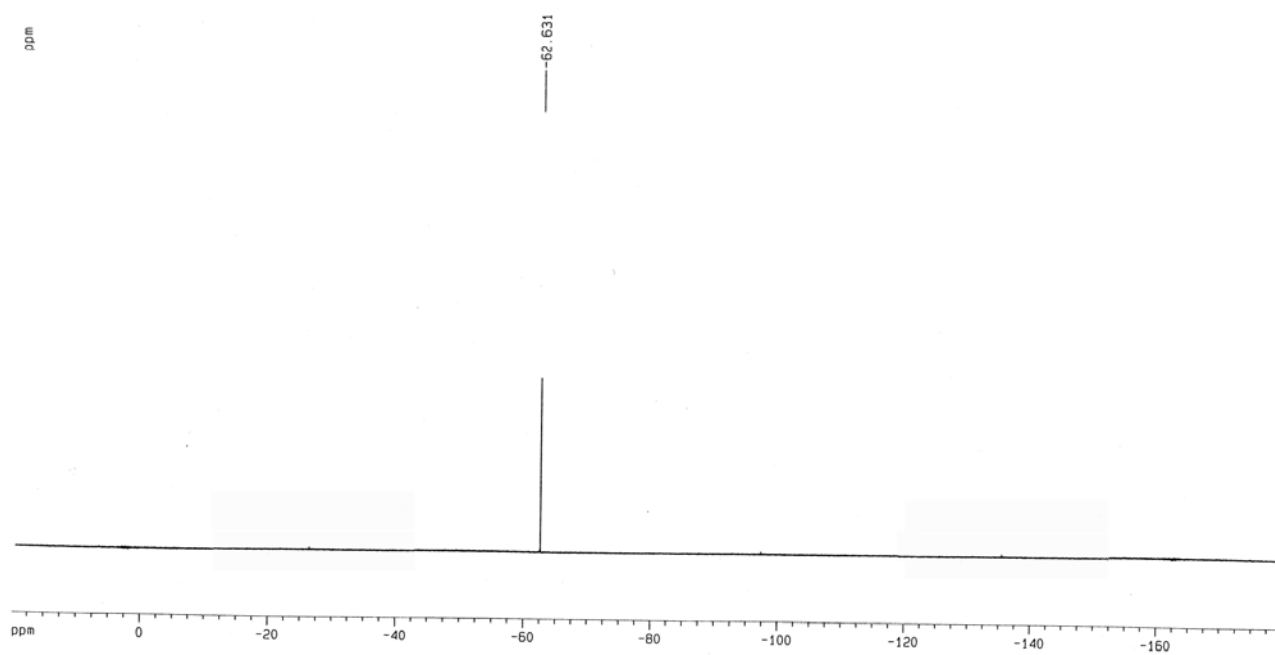

7t + 7t'

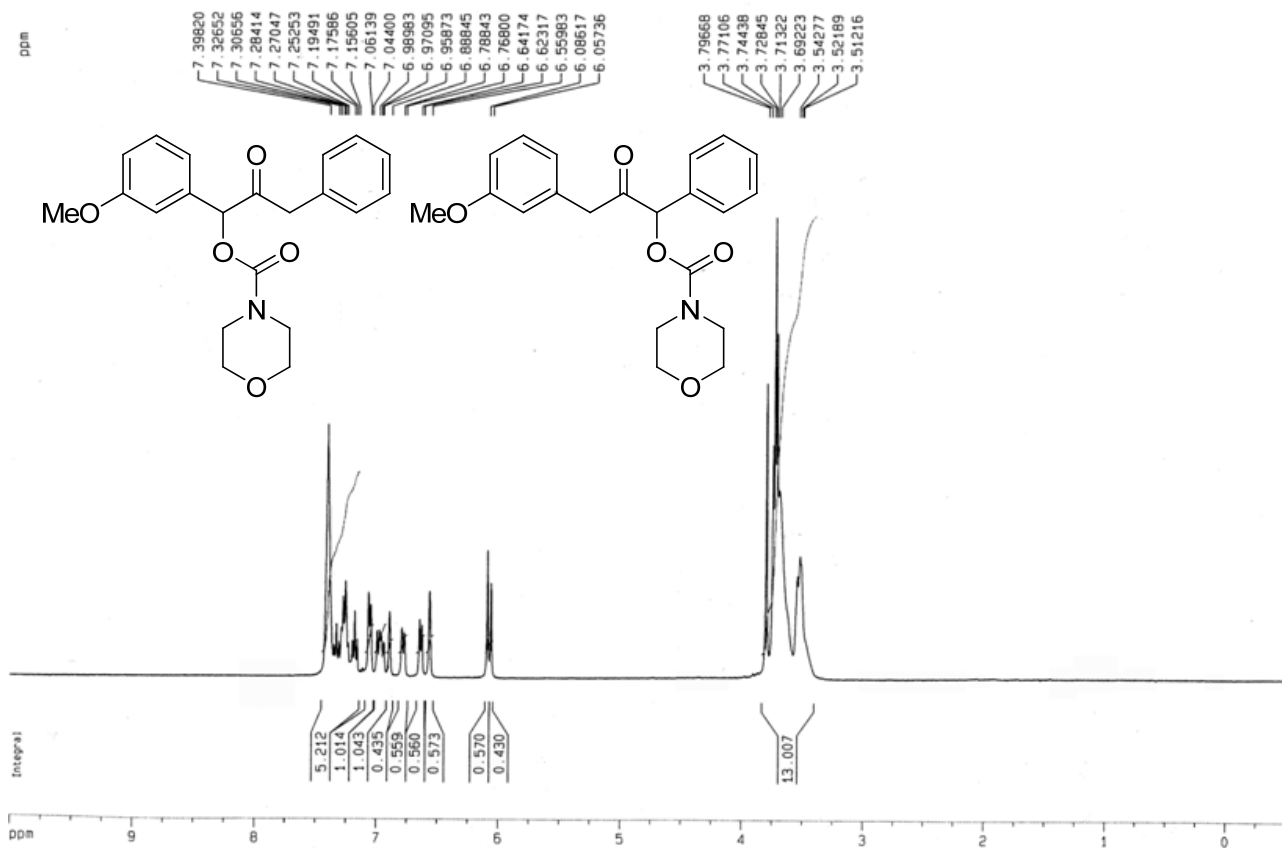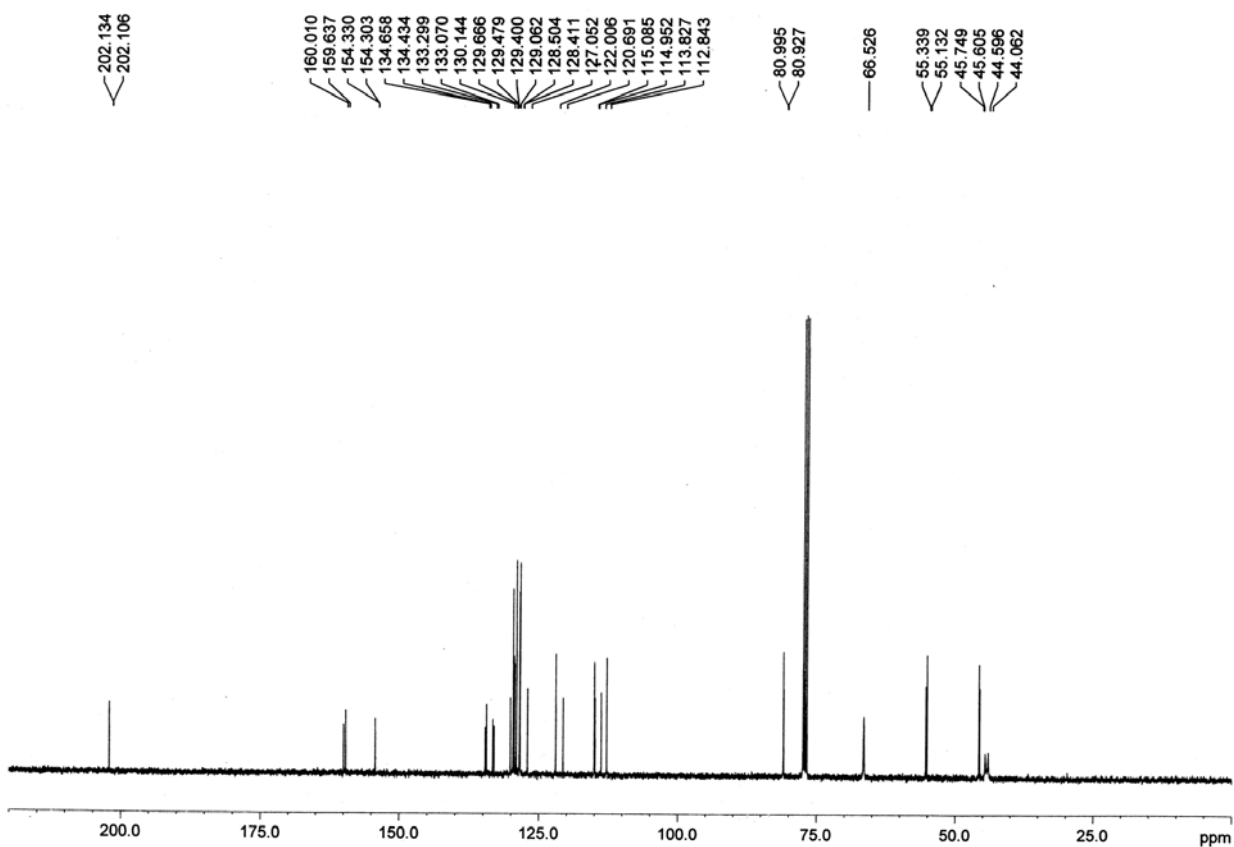

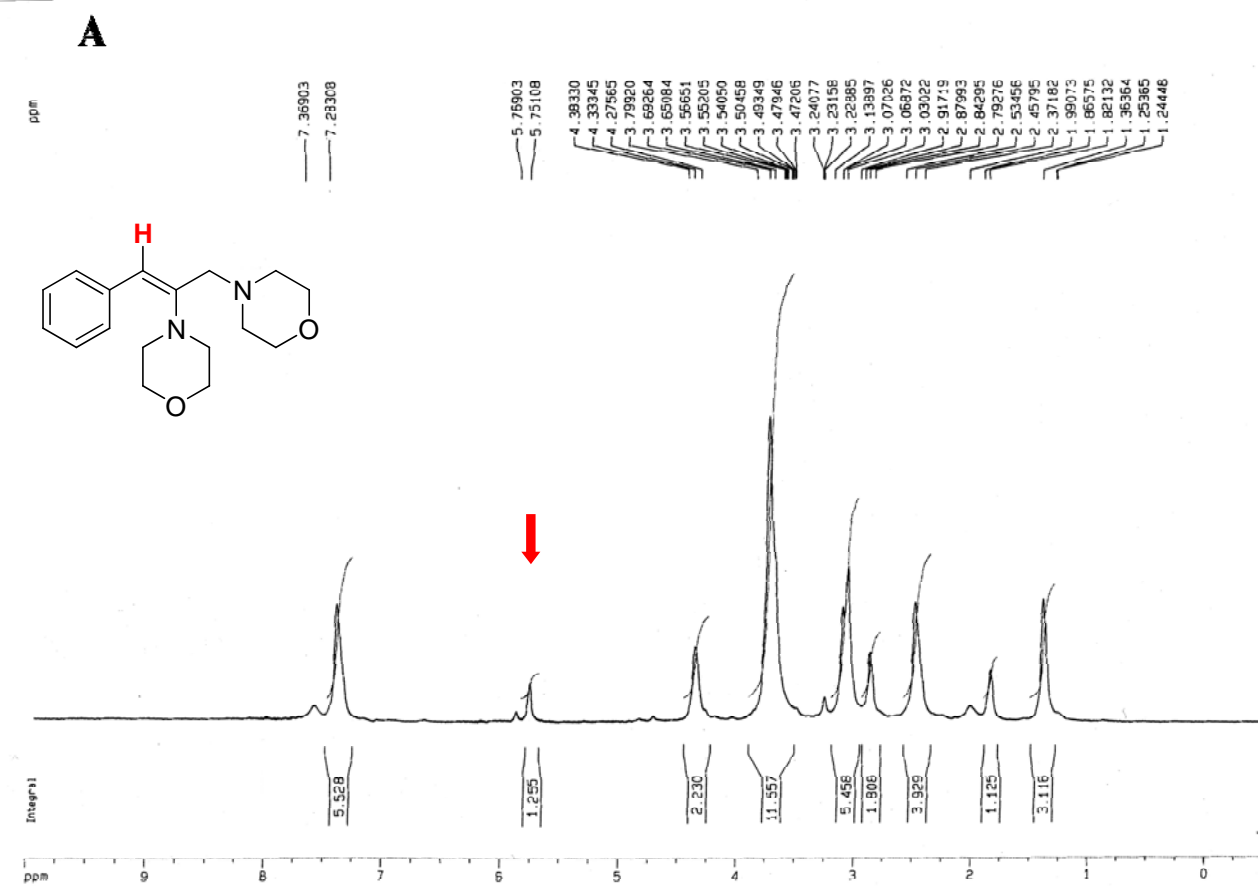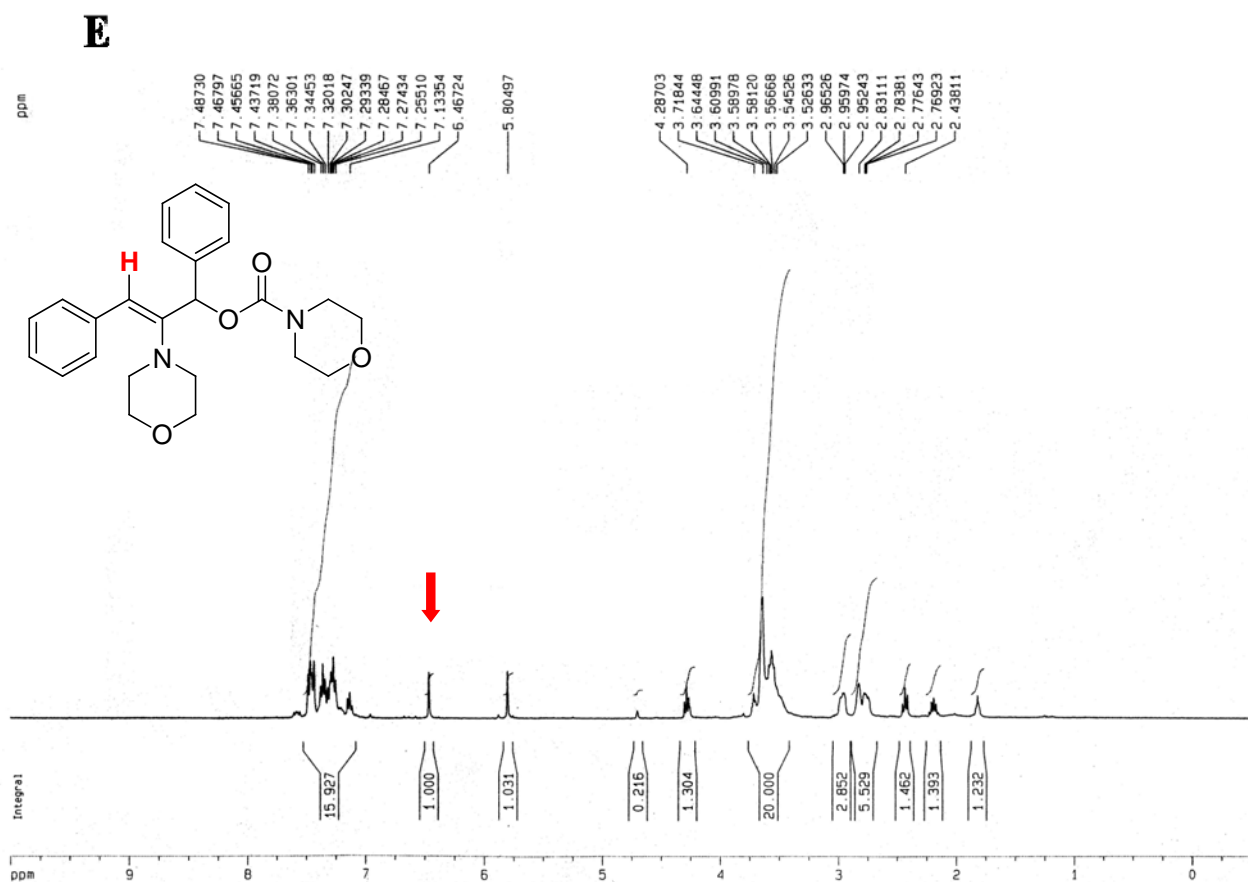

Supplement: c2ob25670c.pdf [file c2ob25670c.pdf]
